# Supplementary material
Source: PubMed Central journal article supplement (PMC4147977)
Supplement: ASN.2013080879_ASN2013080879SupplementaryData.pdf [file ASN.2013080879_ASN2013080879SupplementaryData.pdf]

Appendix to:

**Physician Visits and 30-Day Hospital Readmissions in Patients Receiving Hemodialysis**

Contents:

*Methods*

- Data and Study Population
- Two-Sample, Two-Stage Least Squares Analysis
- Calculating the Net Change in Cost Associated with One More Attempted Visit to Patients in the Month Following Hospitalization
- Estimating the Change in Total Number of Hospitalizations in Dialysis Patients from One More Attempted Visit to Each Patient
- Estimating Net Aggregate Cost Implications Associated with One More Attempted Visit
- Sensitivity and Additional Analyses

*Tables and Figures*

- Table S1: First-Stage Instrumental Variable Regression Results for For-Profit, Non-Medicaid, Metropolitan Cohort (main cohort)
- Table S2: Baseline Characteristics in For-Profit, Medicaid, Metropolitan Cohort
- Table S3: Evaluation of Instrument in For-Profit, Medicaid, Metropolitan Cohort
- Table S4: Instrumental Variable Regression Results in For-Profit, Medicaid, Metropolitan Cohort
- Table S5: First-Stage Instrumental Variable Regression Results for For-Profit, Medicaid, Metropolitan Cohort
- Table S6: Baseline Characteristics in For-Profit, Non-Medicaid, Non-Metropolitan Cohort
- Table S7: Evaluation of Instrument in For-Profit, Non-Medicaid, Non-Metropolitan Cohort
- Table S8: Instrumental Variable Regression Results in For-Profit, Non-Medicaid, Non-Metropolitan Cohort
- Table S9: First-Stage Instrumental Variable Regression Results for For-Profit, Non-Medicaid, Non-Metropolitan Cohort
- Table S10: Baseline Characteristics in For-Profit, Medicaid, Non-Metropolitan Cohort
- Table S11: Evaluation of Instrument in For-Profit, Medicaid, Non-Metropolitan Cohort
- Table S12: Instrumental Variable Regression Results in For-Profit, Medicaid, Non-Metropolitan Cohort

- Table S13: First-Stage Instrumental Variable Regression Results for For-Profit, Medicaid, Non-Metropolitan Cohort
- Table S14: Baseline Characteristics in Nonprofit Cohort
- Table S15: Evaluation of Instrument in Nonprofit Cohort
- Table S16: Instrumental Variable Regression Results in Nonprofit Cohort
- Table S17: First-Stage Instrumental Variable Regression Results for Nonprofit Cohort
- Table S18: Regression Results for Cost Analysis
- Table S19: Sensitivity Analyses – Estimated Probability of Re-hospitalization under Alternative Visit Frequency Assumptions
- Table S20: Sensitivity Analyses – Probability of Re-hospitalization using Mean Visit Frequency by Health Service Area as an Instrumental Variable
- Table S21: Sensitivity Analyses – Change in the probability of re-hospitalization associated with one more visit per month using visits per available day as the exposure.
- Table S22: Sensitivity Analyses – Controlling for clustering within dialysis facilities in the primary study cohort
- Table S23: Comparison of Characteristics by Age Group
- Table S24: Reduction in Absolute Probability of Re-hospitalization from an Additional Physician Visit Under Alternative Scenarios about Relative Efficacy
- Table S25: Expanded Model – Primary Study Cohort
- Table S26: Linear Regression Results without Using Instrumental Variable

### Data and Study Population:

Patient-months between January 1<sup>st</sup> 2004 and December 31<sup>st</sup> 2009 were included in our analysis. Patient-months were included if patients: 1) received in-center hemodialysis, and; 2) were covered by Medicare Parts A&B. Among the eligible patient-months, hospitalizations lasting greater than two days and where the patient was discharged in the last two days of a calendar month were selected as “index hospitalizations.” An individual patient could have more than one “index hospitalization.” If a patient had index hospitalizations in different calendar years, she would be assigned different values for the instrumental variable reflecting mean visits to prevalent hemodialysis patients for each year of “index hospitalization”.

Our study only included patients with Medicare Parts A&B insurance coverage. Among patients receiving hemodialysis, this is a majority of the overall population. We examined the effect of this criterion on inclusion in our study by tabulating the percentage of patients receiving in-center hemodialysis at the start of each calendar year during the study period (January 1<sup>st</sup> 2004 through January 1<sup>st</sup> 2009) with Medicare Parts A&B coverage. On January 1<sup>st</sup> 2004, 72.8% of patients had Medicare Parts A&B coverage. On January 1<sup>st</sup> 2005, 72.7% had Medicare Parts A&B coverage. On January 1<sup>st</sup> 2006, 71.5% had Medicare Parts A&B coverage. On January 1<sup>st</sup> 2007, 70.0% had Medicare Parts A&B coverage. On January 1<sup>st</sup> 2008, 67.6% had Medicare Parts A&B coverage. On January 1<sup>st</sup> 2009, 65.2% had Medicare Parts A&B coverage.

The instrumental variable is the mean number of provider visits to prevalent hemodialysis patients at a given patient’s dialysis facility in the year of “index hospitalization.” This measure was calculated for each dialysis facility in each year of the study period. Prevalent hemodialysis patients were considered “eligible” to be included in calculation of the instrumental variable in months when they were: 1) alive; 2) receiving in-center hemodialysis, and; 3) covered by Medicare Parts A&B. Patients meeting these criteria for only part of a calendar year only contributed the months when the criteria were met in calculation of mean visits at their facility for that year. The following equation illustrates how the instrumental variable was calculated:

$$MeanVisits_{facility} = \frac{\sum_{j=1}^{j=z} \left[ (VisitsMonth_{1,j} + VisitsMonth_{2,j} + \dots + VisitsMonth_{k,j}) / k \right]}{z}$$

Where:

VisitsMonth<sub>1-k</sub> for patient j represents the months in the calendar year when patient j is eligible to be included in the calculation.

Patient j=1 through j=z represent all patients with months that are eligible for inclusion in the calculation receiving dialysis at a given facility in a given calendar year.

## Two-Sample, Two-Stage Least Squares Analysis:

To minimize potential bias due to unobserved characteristics that are associated with physician visit frequency and the probability of re-hospitalization, and to address endogeneity (or “reverse causality”) between physician visit frequency and re-hospitalization or death, we used a two-sample, two-stage least squares analysis. This methodological approach was first described by Krueger et al.<sup>1</sup> We also used the following measure of physician visit frequency practice patterns in a dialysis facility as an instrumental variable:

*The average number of physician visits to prevalent hemodialysis patients with Medicare Parts A&B coverage at a patient’s dialysis facility in a given year.*

When calculating the instrument, we exclude patients who were included in our analysis cohorts. In the two-sample, two-stage least squares analysis, we use linear probability models for each cohort to estimate the relationship between visit frequency and probability of re-hospitalization – ‘ $\beta$ ’ – in the following two steps:

- 1) In the first step (illustrated below) we use a sample of all patients in a given cohort who are not hospitalized and do not die in the month following hospital discharge to estimate the effect of the instrument  $Z_{it}$  on visit frequency in the month following hospitalization:

$$Visits_{it} = \gamma_0 + \gamma_1 Z_{it} + X'_{it} \gamma_2 + e_{it}$$

Where,

$Visits_{it}$  = Predicted frequency of physician visits in the month following hospitalization in patient<sub>i</sub> at time<sub>t</sub>.

$Z_{it}$  = Value of the instrumental variable (i.e. mean visit frequency to prevalent hemodialysis patients at a patient’s dialysis facility) for patient<sub>i</sub> at time<sub>t</sub>.

$X'_{it}$  = Vector of covariates for patient<sub>i</sub> at time<sub>t</sub>.

- 2) In the second step (illustrated below) we used the entire sample of patients in a given cohort (i.e. patients who were hospitalized and died in addition to those who were not hospitalized and did not die). For each patient<sub>i</sub> and time<sub>t</sub>, based on their vector of covariates and value of the instrumental variable, we predicted the visit frequency. The predicted visit frequency (*Predicted Visits<sub>it</sub>*) was used in the second stage equation to estimate the relationship between visit frequency and probability of re-hospitalization:

$$Rehosp_{it} = \alpha + \beta * Predicted\ Visits_{it} + X'_{it} * \delta + \omega_{it}$$

Where,

$Rehosp_{it}$  = Denotes whether a patient<sub>i</sub> at time<sub>t</sub> was re-hospitalized in the month following hospital discharge.

*Predicted Visits<sub>it</sub>* = The visit frequency that *would have* occurred in the month following hospital discharge in patient<sub>i</sub> at time<sub>t</sub> if the patient *were not* hospitalized and *did not* die as a function of the instrumental variable.

$X'_{it}$  = Vector of covariates for patient<sub>i</sub> at time<sub>t</sub>.

Because, as outlined in the *methods* and *results* sections of the manuscript, the instrument (visit frequency in prevalent hemodialysis patients receiving dialysis at a given patient's facility in the calendar year) is not associated with the primary outcome (re-hospitalization) other than through the exposure (visit frequency), the association between 'Predicted Visits' and 'Re-hospitalization' – ( $\beta$ ) – provides an unbiased estimate of the relationship between physician visits and re-hospitalization.

The reduced form equation for the two-sample instrumental variable analysis is:

$$Rehosp_{it} = \theta_0 + \theta_1 * Z_{it} + X'_{it}\theta_2 + v_{it}$$

Where,

$Rehosp_{it}$  = probability of re-hospitalization in patient<sub>i</sub> at time<sub>t</sub>

$Z_{it}$  = value of instrumental variable in patient<sub>i</sub> at time<sub>t</sub>

$X'_{it}$  = Vector of covariates for patient<sub>i</sub> at time<sub>t</sub>

As Manacorda and Moretti describe in their discussion of two-sample IV estimators, Angrist and Krueger's two-sample IV estimator gives a consistent estimate of ' $\beta$ ', which is equal to the ratio of the reduced form coefficient over the first stage coefficient<sup>1, 2</sup>:

$$est(B^{IV}) = est(\theta_1^{OLS})/est(\gamma_1^{OLS})$$

Calculating the Net Change in Cost Associated with One More Attempted Visit to Patients in the Month Following Hospitalization:

When determining the cost savings from reduced re-hospitalizations in counterfactual scenarios where providers *attempt* to see patients one additional time, we assumed that providers who *attempt* to see patients one additional time in the month following hospital discharge impart the benefit (in terms of reduced cost of re-hospitalization) associated with one additional *predicted* visit. We calculated these cost savings by multiplying the change in probability of re-hospitalization from one additional *attempted* visit by the average cost of a re-hospitalization.

$$\begin{aligned} & \textit{Expected Savings from Additional Attempted Visit} \\ & = \textit{(Decreased Probability of Rehospitalization)} \\ & * \textit{(Average Cost of Rehospitalization)} \end{aligned}$$

Where,

Decreased Probability of Re-hospitalization = estimated decrease in the probability of re-hospitalization associated with one additional predicted visit from the main analysis cohort.

Average Cost of Re-hospitalization = the average cost of re-hospitalization estimated from a generalized linear model involving all cohorts

To estimate the cost paid by Medicare for additional physician visits in the counterfactual scenario where providers *attempt* to see patients one additional time in the month following hospital discharge, we first estimated how often patients would *actually* be seen if providers *attempt* one additional visit. To do this, we took the ratio of *predicted* visits to *actual* visits in patients who were re-hospitalized (0.684) and in patients who were not re-hospitalized (0.958). [Note that this ratio does not equal 1 in patients who were not re-hospitalized because some of these patients died in the month following discharge.] We assumed that the cost (in terms of increased reimbursement from Medicare) from an additional *attempted* visit equals the cost for an additional visit multiplied by the ratio of *actual* to *predicted* visits for each group, since providers attempting to see patients one additional time don't always succeed in seeing the patients due to hospitalization or death. We assumed one extra visit was reimbursed at the rate of a 4<sup>th</sup> monthly visit (\$64 USD). This calculation is represented below:

$$\textit{Cost from One Additional Attempted Visit} = \textit{(Reimbursement for Visit)} * \textit{(Ratio)}$$

Where,

Reimbursement for visit = the national average difference in amount paid to providers by Medicare for four provider visits compared to two-to-three provider visits in 2009.

Ratio = the ratio of predicted to actual provider visits (0.96 in patients not re-hospitalized and 0.68 in patients who are re-hospitalized).

We assumed the added reimbursement cost of an additional *attempted* visit was equal to a weighted average of the “Cost from One Additional Attempted Visit” in patients who are re-hospitalized and in patients who are not re-hospitalized. To determine weights for calculating the weighted average, we used the percentage of re-hospitalizations observed in all of our Medicare cohorts combined (38.5%) as a baseline, and subtracted the reduced probability of re-hospitalization from our main analytic cohort (3.5%) to obtain an estimated probability of re-hospitalization  $0.385 - 0.035 = 0.350$  in the counterfactual scenario of one additional *attempted* visit. The weighted average calculation is displayed below:

*Weighted Avg. of Additional Attempted Visit Cost*

$$= (\text{Cost attempted visit in patients}_{group\ a}) * (\text{Prop}_{group\ a}) \\ + (\text{Cost attempted visit in patients}_{group\ b}) * (\text{Prop}_{group\ b})$$

Where,

Group a = patients who are re-hospitalized

Group b = patients who are not re-hospitalized

$\text{Prop}_{group\ a}$  = Mean proportion of re-hospitalizations in all of our Medicare cohorts minus the reduced probability of re-hospitalization from additional attempted visit.

$\text{Prop}_{group\ b} = 1 - \text{Prop}_{group\ a}$

Finally, we subtracted the weighted average of the “Cost from One Additional *Attempted* Visit” from the “Expected Savings from Additional *Attempted* Visit” to determine the “Net Change in Cost Associated with One More *Attempted* Visit.”

Estimating the Change in Total Number of Hospitalizations in Dialysis Patients from One More Attempted Visit to Each Patient:

To estimate the change in total hospitalizations per year in patients receiving hemodialysis associated with one additional *attempted* visit to all patients in the month following a hospital discharge, we first determined the total number of hospitalizations experienced by patients receiving in-center hemodialysis in 2009. This calculation was based on the total number of patients receiving in-center hemodialysis and the average number of hospitalizations per patient-year reported by the USRDS using the following equation:

- Total # of patients receiving hemodialysis in the U.S. in 2009: 378,489
- Rate of hospitalizations per year: 1.85
- Total # hospitalizations = 378,489\*1.85=700,204

Assuming an annual rate of death of 0.28 in patients receiving in-center hemodialysis (reported by USRDS), a proportion of deaths occurring while hospitalized of 0.59 (reported by O'Hare et al.)<sup>3</sup>, and an average of 1.85 hospitalizations per year (reported by USRDS), we calculated the probability of death during a hospitalization using the following equation:

$$Prob\ Death\ Hosp = (Prob\ Death\ Yr * Prop\ Death\ Hosp) / Num\ Hosp\ Yr$$

Where,

Prob Death Hosp = probability of death during a hospitalization

Prob Death Yr = Annual probability of death

Prop Death Hosp = Proportion of deaths occurring while in the hospital

Num Hosp Yr = Average number of hospitalizations per year

We assessed the accuracy of this estimate by comparing it to the probability of death during a hospitalization observed in our Medicare patient cohorts. The calculated probability of death during a hospitalization for the entire hemodialysis population was 9%, only 1% less than that which we observed empirically in our Medicare cohorts.



Using the rate of re-hospitalization in 2009 of 0.363 reported by USRDS, we imputed the total number of first hospitalizations in 2009, where first hospitalizations refers to hospitalizations in patients who were not discharged from the hospital in the previous month. The following algorithm was used to impute this value:

$$\begin{aligned} \text{Total \# Hosp} = & \text{First Hosp} + (\text{First Hosp} * \text{Prob Surv Hosp}^1 * \text{Prob Rehosp}^1) \\ & + (\text{First Hosp} * \text{Prob Surv Hosp}^2 * \text{Prob Rehosp}^2) + \dots (\text{First Hosp} \\ & * \text{Prob Surv Hosp}^n * \text{Prob Rehosp}^n) \end{aligned}$$

Where,

First Hosp = the imputed value for first hospitalizations

Total # Hosp = the previously calculated total number of hospitalizations in patients receiving in-center hemodialysis in 2009

Prob Surv Hosp is the calculated probability of surviving a hospitalization equal to: 1 - probability of death during a hospitalization.

Prob Rehosp is the reported probability of re-hospitalization in 2009.

This equation was carried out until  $n=20$  and a solver function was used to impute the number of First Hospitalizations. Past  $n=20$  there is essentially zero probability of being re-hospitalized.

We used the following equation to determine the total number of hospitalizations that would occur if physicians attempt to see patients discharged from the hospital one additional time in the subsequent month:

$$\begin{aligned} \text{Total Hosp}_{\text{extra visit}} & = \text{First Hosp} \\ & + (\text{First Hosp} * \text{Prob Surv Hosp}^1 * \text{Prob Rehosp Extra Visit}^1) \\ & + (\text{First Hosp} * \text{Prob Surv Hosp}^2 \\ & * \text{Prob Rehosp Extra Visit}^2) + \dots (\text{First Hosp} * \text{Prob Surv Hosp}^n \\ & * \text{Prob Rehosp Extra Visit}^n) \end{aligned}$$

Where,

Total Hosp<sub>extra visit</sub> = the total number of hospitalizations in patients receiving in-center hemodialysis in 2009 if physicians attempt one additional visit in the month following discharge

First Hosp = the number of first hospitalizations (imputed in the previous equation)

Prob Surv Hosp = the calculated probability of surviving a hospitalization equal to: 1 - probability of death per hospitalization

Prob Rehosp Extra Visit = the probability of re-hospitalization under the scenario where providers attempt to see patients one additional time in the month following discharge.

The “Change in Total Number of Hospitalizations” was the difference between the total number of hospitalizations per year (Total # Hosp) and the number of hospitalizations that would occur if providers tried to see patients one additional time following hospital discharge (Total Hosp<sub>extra visit</sub>).

### Estimating Net Aggregate Cost Implications Associated with One More Attempted Visit:

To estimate “the net aggregate cost implications of an extra *attempted* visit,” we first calculated the “aggregate cost savings” associated with one additional attempted visit in the month following hospital discharge using the following equation:

$$\begin{aligned} \text{Aggregate Cost Savings} \\ = \text{Difference in Hospitalizations} * \text{Avg Cost Per Hospitalization} \end{aligned}$$

Where,

Difference in Hospitalizations = the reduction in total number of hospitalizations per year associated with one additional provider visit following hospital discharge (estimated above)

Average Cost Per Hospitalization = Added cost in month of re-hospitalization obtained from a regression analysis using our full cohort of Medicare patients

Next, we calculated the actual number of additional visits that would be expected to occur if physicians *attempted* to see patients one additional time per month following hospital discharge using the following equation:

$$\begin{aligned} \text{Actual Visits} = & [ \text{Total Hosp}_{\text{extra visit}} * \text{Prob Rehosp}_{\text{extra visit}} * \text{Prob Visit}_{\text{rehosp}} ] \\ & + [ \text{Total Hosp} * (1 - \text{Prob Rehosp}_{\text{extra visit}}) * \text{Prob Visit}_{\text{no rehosp}} ] \end{aligned}$$

Where,

Actual Visits = the number of actual visits to patients that would occur if providers attempted to see patients one additional time in the month following hospitalization.

Total Hosp<sub>extra visit</sub> = the calculated total number of hospitalizations that would occur if providers attempted to see patients one additional time in the month following hospitalization

Prob rehosp<sub>extra visit</sub> = the estimated probability of re-hospitalization if physicians attempted to see patients one additional time in the month following hospital discharge (note, this is identical to *Prop<sub>group a</sub>* above)

Prob Visit<sub>rehosp</sub> = The probability of an extra visit in patients who are re-hospitalized if their physicians attempt to see them one additional time (calculated from the ratio of predicted versus actual visits in patients who are re-hospitalized)

Prob Visit<sub>no Rehosp</sub> = The probability of an extra visit in patients who are not re-hospitalized if their physicians attempt to see them one additional time (calculated from the ratio of predicted versus actual visits in patients who are not re-hospitalized)

The “aggregate cost of encouraging an extra visit” was then calculated by multiplying the cost of an extra visit (based from CMS reimbursement for a 4<sup>th</sup> visit) by the calculated “Actual Visits”. Finally, the “net aggregate cost implications of an extra *attempted* visit” were calculated by subtracting the “aggregate cost of encouraging an extra visit” from the “aggregate cost savings” from an extra *attempted* visit.

## Sensitivity and Additional Analyses

### *Sensitivity to visit frequency assumptions*

To test our model's sensitivity to assumptions about the number of visits occurring when 2-3 visits and four or more visits are documented on medical claims, we performed three separate analyses in the main cohort under different visit frequency assumptions. In each case, the statistical methods were identical to those described in methods of the main text. First, we assumed that patients were seen six times in months when four or more visits were documented in Medicare claims (in our primary analysis we assumed there were four visits in these months). Second, we assumed that there were three visits in months when 2-3 visits were claimed (in the primary analysis we assumed there were 2.5 visits). Finally, we assumed that there were two visits when 2-3 visits were claimed. Estimates for the relationship between visit frequency and absolute probability of re-hospitalization ranged from -1.9% to -3.8% under these different assumptions, and all three estimates were statistically significant ( $p < 0.05$ ). (**Table S19**)

### *Sensitivity to instrumental variable*

We also tested the model's sensitivity to the instrumental variable used, since it is possible that patients in dialysis facilities share certain unobserved characteristics or that physicians caring for patients at the same facility have similar practice patterns regarding re-hospitalization. In a secondary analysis, we used hospital service areas (HSA) as an instrumental variable to predict visit frequency in all 5 patient cohorts. Results were similar to our primary analysis, except that the inverse association between visit frequency and re-hospitalization was of borderline statistical significance when using HSA was used as the instrumental variable. (**Table S20**)

### *Sensitivity to possible selection bias from two-sample least squares analysis*

Our two-sample, two-stage least squares analysis makes an important assumption about the relationship between mean visit frequency at a patient's dialysis facility and the number of visits that would occur if a patient was not re-hospitalized or did not die. It assumes that this relationship (after adjusting for differences in observed covariates) is the same regardless of whether a patient lives, dies, or is hospitalized. One potential way that this assumption could lead to bias is if by reducing the likelihood of re-hospitalization, more frequent visits causes sicker patients to remain in the non-hospitalized group. If sicker patients are, on average, seen more frequently by their physician, then this could lead to an overestimation of the relationship between mean visit frequency at a patients' facility and visits to patients who were re-hospitalized by selecting sicker patients in the first-stage estimate.

To examine sensitivity to this potential bias, we performed a separate analysis on all five patient cohorts where the exposure of interest was the number of provider visits per day when a patient

was available to be seen by a physician or advanced practitioner. We assumed that on days when a patient was hospitalized or dead she was not available to be seen in an outpatient setting by her provider. The value of this new exposure variable varied from 0 to 0.134 (which is 4 visits in a 30 day month). We truncated visits per day by assuming that all patient-months with greater than 0.134 visits per day had 0.134 visits per day.

We then conducted a one-sample, two-stage least squares instrumental variable analysis using the new exposure variable. This was done for all five study cohorts. In the main study cohort, one additional provider visit per month was associated with a 1.9% (95% CI 0.1%-3.6%) reduction in the absolute probability of re-hospitalization. In the remaining four cohorts, the reduction ranged from 0.1% to 4.0%, and was statistically significant in the same groups as in the primary analysis. (**Table S21**)

This analysis demonstrates that our findings were not sensitive to possible selection bias from the two sample method. However, it is important to note that using provider visits per day available as the exposure variable likely underestimates the relationship between provider visits and re-hospitalization for the following reason: In patients who were hospitalized, there was evidence that some providers attempted to “make up” for lost days. We found that approximately 38.5% of patients who were re-hospitalized had more than the amount of visits per day available corresponding to 4 visits per month, even after accounting for differences in the length of a month. In contrast, no patients who died or were not re-hospitalized had visits per day that corresponded to more than 4 visits per month. We corrected for this, in part, by not allowing visits per day to exceed 0.134. However, among patients who were re-hospitalized, visits per day in the period prior to re-hospitalization was still likely overestimated due to our inability to exclude the proportionally higher number of visits that occur in the period following re-hospitalization in our calculation of visits per day. As a result, there would be a bias towards more visits being associated with re-hospitalization, mitigating the inverse association between visit frequency and re-hospitalization.

#### *Sensitivity to clustering at the dialysis facility level*

The probability of re-hospitalization is likely to be correlated within individuals. We account for this possibility in our analyses using block bootstrap standard errors, clustering on individual patients. However, it is possible that patients dialyzing at the same dialysis facility also have a correlation in their likelihood of re-hospitalization. We tested our model’s sensitivity to this possibility by using block bootstrap standard errors where we cluster by dialysis facility. We did this for our primary study cohort. The results from 10,000 simulations are illustrated in **table S22**. The effect of one additional physician visit on the absolute probability of re-hospitalization was -3.5% (95% CI -1.5% to -5.4%), which has standard errors nearly identical to the results from our primary analysis.”

#### *Exploration of Inverse Association between Age and Re-hospitalization*

Older age was inversely associated with more frequent visits in all of our cohorts. Since age was adjusted for in our analyses, this inverse association does not bias our results. However, to evaluate why this inverse association is present, we performed several exploratory analyses. First, we conducted the two-sample, two-stage least squares analysis for the entire study population (all 5 cohorts combined) after dividing age into the following three categories: 1) Age under 50; 2) Age between 50 and 75, and; 3) Age over 75. We found that the difference in rate of re-hospitalization was most prominent for the youngest group of patients (those 50 and under), with those patients experiencing relatively greater probability of re-hospitalization compared with older groups. Specifically, compared to patients 50 and younger, patients between 50 and 75 had a 5.5% decrease in the probability of re-hospitalization (95% CI -4.5% to -6.5%), while those over 75 had a 7.5% decrease (95% CI -6.3% to -8.7%). This suggests that younger patients may be different in important ways than older patients.

In the following steps we used data from the USRDS Atlas<sup>4</sup> to assess overall hospitalization rates for patients in each of the following three age categories: 1) under 50; 2) between 50 and 75, and; 3) over 75.

- 1) For each age category, we calculated the total number of prevalent hemodialysis patient-years from 2004 through 2009.
- 2) The USRDS publishes hospitalization and prevalent dialysis data for age groups that are subsets of the age categories used for this analysis. For each age group (and year) published by the USRDS that is a subset of a larger age category, we calculated its share of the total number of prevalent hemodialysis patient-years for the age category (calculated in step 1)
- 3) We multiplied the reported overall hospitalization rates for each age group and year by its share of the total number of prevalent hemodialysis patient-years in the age category.
- 4) We took the sum of the estimates from step 3 in each age category to determine an average unadjusted overall rate of hospitalization for each age category between 2004 and 2009.

We found the overall rate of hospitalizations was 2.33 per patient year in patients under 50 years of age, 2.36 in patients between 50 and 75, and 2.52 in patients over 75, suggesting a trend towards more hospitalizations in older patients, which is the opposite direction from that observed in patients re-hospitalized. This suggests that re-hospitalizations may be different from overall hospitalizations.

A comparison of patient characteristics from our cohort among patients under 50 and those older suggests that these groups are different in fundamental ways. Using a 10% standardized difference as a marker of heterogeneity, patients under 50 were more likely to be African American, to smoke, use drugs, and drink alcohol. They were also more likely to be HIV positive and have liver or rheumatic disease. They were less likely to be in the first year of dialysis. In contrast, patients over 50 were more likely to have certain medical co-morbidities including

cerebrovascular, pulmonary, and coronary disease in addition to heart failure, cancer, dementia, diabetes and peripheral vascular disease. **(Table S23)** We speculate that younger patients may represent a group with poorer adherence, which may contribute to their higher rate of re-hospitalization, while their improved overall health contributes to lower rates of overall hospitalization in these younger patients.

*Exploring differences in effectiveness between physicians and advance practitioners*

Beyond one comprehensive visit per month, additional provider visits to patients receiving outpatient hemodialysis in a given month can be performed by either physicians or advanced practitioners. It is possible that, due to different skill sets, one additional visit from physicians in the month following hospital discharge could have a different effect on the likelihood of re-hospitalization than one additional visit from an advanced practitioner. Based on Medicare claims data available to us we were unable to determine who provides visits to patients receiving hemodialysis. A strength of our analysis is that we estimate the effect of one additional visit on the probability of re-hospitalization as it would be expected to occur in clinical practice in the United States. Specifically, the finding in our primary analytic cohort that one additional visit yields a 3.5 percent reduction in the probability of re-hospitalization describes the expected effect of an additional visit provided by the people who actually see patients.

In sensitivity analyses we explored what the effect of one additional physician visit would be given certain assumptions about the proportion of visits currently performed by physicians versus advanced practitioners and assumptions about the relative efficacy of physician visits compared to advanced practitioners. In all sensitivity analyses we assumed that physician visits would be more effective at preventing re-hospitalization than visits from advanced practitioners, while acknowledging that this assumption is speculative and not based on evidence. In sensitivity analyses we examined the following two scenarios: 1) physician visits are 20% more effective than advanced practitioner visits in preventing re-hospitalization, and; 2) physician visits are 40% more effective than advanced practitioner visits in preventing re-hospitalization. We examined each of these scenarios while assuming that: 1) currently 50% of visits are performed by physicians; 2) currently 60% of visits are performed by physicians, and; 2) currently 70% of visits are performed by physicians.

These Sensitivity Analyses were performed using the following two equations:

$$3.5\% = (TxEffect_{AP}) * (PropVisits_{AP}) + (PhysicianEffect) * (TxEffect_{AP}) * (PropVisits_{Phys})$$

$$TxEffect_{Phys} = TxEffect_{AP} * PhysicianEffect$$

Where,

3.5% is the treatment effect from the main analytic cohort

TxEffctAP is the treatment effect for advanced practitioners that was determined to solve the equation

PropVisitsAP and PropVisitsPhys are the assumed proportion of visits performed by advanced practitioners and physicians respectively

PhysicianEffect is the additional effectiveness of physician visits relative to visits from advanced practitioners.

Results from these sensitivity analyses are demonstrated in **Table S24**. Under the assumption that physician visits are 20% more effective than advanced practitioners, one additional physician visit reduced the probability of re-hospitalization by 3.68% to 3.82% depending on the current composition of provider visits (i.e. physicians versus advanced practitioners). Under the assumption that physician visits are 40% more effective than advanced practitioners, one additional physician visit reduced the probability of re-hospitalization by 3.83% to 4.08% depending on the current composition of provider visits.

*Sensitivity to Additional Potential Confounders:*

In an expanded model we incorporate additional potential confounders, including whether or not a dialysis facility is hospital-based, whether a patient is discharged home, to a skilled nursing facility, or to home health, and the cause of index hospitalization. Regression results from an “expanded model” in our primary analysis cohort that includes these additional covariates is illustrated on **Table S25**. Similar to the results from our primary analysis, one additional provider visit in the month following hospital discharge was associated with a 3.4% reduction in the absolute probability of re-hospitalization (95% CI 1.5% to 5.2%).

*Sensitivity to Model Selection:*

We assess sensitivity to our choice of a linear probability model using our primary analysis cohort (i.e. patients without Medicaid residing in metropolitan areas dialyzing in for-profit centers). Similar to in our primary analysis, we use a two-stage, two-sample least squares instrumental variable analysis. However, in this sensitivity analysis we use a probit regression model in the second stage estimation rather than a linear probability model. To avoid potential bias arising from use of an endogenous predictor generated from the first-stage linear regression model (i.e. the number of physician visits that would have occurred if patients were not re-hospitalized and did not die) to predict the study outcome (rehospitalization) in a non-linear probit model, we use a two-stage residual inclusion estimation model. This method has been shown to produce consistent estimates in a broad class of nonlinear models.<sup>5</sup>

In the residual inclusion model, we first calculate from the first-stage linear regression estimates the first-stage ‘residual’ for each patient, where the ‘residual’ is equal to ‘Actual visits’ less ‘Predicted Visits’. Then, in the second-stage probit model, ‘Actual Visits’ and the first-stage ‘residual’ are included as independent variables rather than ‘predicted visits’ used in the linear probability model. Similar to the linear probability model, we use block-bootstrapped standard errors with 10,000 simulations. To help interpret regression results, we compare the mean predicted probability of re-hospitalization in patients under actual visit frequencies with the mean predicted probability of re-hospitalization under a scenario where there is one additional visit to each patient.

The coefficient for physician visits from the probit model is -0.117 (95% CI -0.169—0.657), indicating a statistically significant inverse relationship between more frequent visits and re-hospitalization. Based on the regression results, under a scenario where patients are seen by their physician (or advanced practitioner) the number of times that actually occurred, the mean predicted probability of re-hospitalization is 37.9%. If patients are seen one additional time, the mean predicted probability of re-hospitalization decreases to 33.9%. This is consistent with a 3.98% reduction in the probability of re-hospitalization from one additional visit. This is similar in magnitude to the 3.5% reduction observed in our main analysis using a linear probability model.



Table S1: First-Stage Instrumental Variable Regression Results for For-Profit, Non-Medicaid, Metropolitan Cohort (main cohort)

|                                              | Change in<br>Provider<br>Visits/Month | LCI         | UCI    |
|----------------------------------------------|---------------------------------------|-------------|--------|
| One additional mean visit at facility        | 0.586                                 | 0.552       | 0.619  |
| Demographic & socioeconomic characteristics: |                                       |             |        |
| Male sex                                     | 0.043                                 | 0.005       | 0.081  |
| Age (10 years)                               | 0.027                                 | 0.010       | 0.043  |
| White                                        |                                       | (reference) |        |
| Native American                              | 0.182                                 | -0.076      | 0.440  |
| Black                                        | 0.079                                 | 0.036       | 0.121  |
| Other race                                   | 0.125                                 | -0.002      | 0.252  |
| Hispanic ethnicity                           | 0.014                                 | -0.055      | 0.084  |
| Alcohol use                                  | -0.120                                | -0.263      | 0.023  |
| Drug use                                     | -0.025                                | -0.122      | 0.073  |
| Smoking history                              | -0.010                                | -0.082      | 0.062  |
| Co-morbidities:                              |                                       |             |        |
| Cerebrovascular disease                      | 0.043                                 | 0.002       | 0.083  |
| Peptic ulcer disease                         | 0.028                                 | -0.015      | 0.072  |
| Coronary artery disease                      | 0.025                                 | -0.016      | 0.066  |
| Heart failure                                | 0.009                                 | -0.038      | 0.056  |
| Pulmonary disease                            | 0.035                                 | -0.005      | 0.074  |
| HIV                                          | -0.020                                | -0.215      | 0.176  |
| Cancer                                       | 0.027                                 | -0.026      | 0.081  |
| Dementia                                     | -0.048                                | -0.103      | 0.008  |
| Diabetes                                     | 0.022                                 | -0.020      | 0.064  |
| Liver disease                                | 0.076                                 | 0.017       | 0.136  |
| Paralysis                                    | -0.001                                | -0.088      | 0.087  |
| Peripheral vascular disease                  | 0.030                                 | -0.009      | 0.068  |
| Rheumatic disease                            | -0.042                                | -0.126      | 0.043  |
| Acuity of illness:                           |                                       |             |        |
| First year of dialysis                       | -0.052                                | -0.107      | 0.003  |
| Duration of hospitalization (days)           | -0.005                                | -0.007      | -0.004 |
| Facility Characteristics                     |                                       |             |        |
| Facility size (25 patient difference)        | 0.024                                 | 0.016       | 0.033  |

Table S2: Baseline Characteristics in For-Profit, Medicaid, Metropolitan Cohort

|                                         | Re-hospitalized |                | Standardized Difference |
|-----------------------------------------|-----------------|----------------|-------------------------|
|                                         | No (n=16,321)   | Yes (n=11,598) |                         |
| <b>Demographic</b>                      |                 |                |                         |
| Males - (%)                             | 59.0            | 56.2           | 5.7                     |
| Age - (years)                           | 59.9            | 57.9           | 13.2                    |
| American Indian - (%)                   | 0.9             | 0.9            | 0.1                     |
| Black - (%)                             | 48.9            | 52.6           | 7.5                     |
| White - (%)                             | 45.5            | 42.4           | 6.3                     |
| Other race - (%)                        | 4.7             | 4.1            | 3.2                     |
| Hispanic ethnicity - (%)                | 22.0            | 19.2           | 6.9                     |
| <b>Socioeconomic and co-morbidities</b> |                 |                |                         |
| Alcohol use - (%)                       | 3.9             | 6.9            | 13.2                    |
| Drug use - (%)                          | 8.4             | 16.3           | 24.0                    |
| Smokes - (%)                            | 14.2            | 21.5           | 19.0                    |
| Cerebrovascular disease - (%)           | 40.4            | 46.0           | 11.2                    |
| Peptic ulcer disease - (%)              | 28.5            | 36.5           | 17.3                    |
| Coronary artery disease - (%)           | 34.1            | 42.3           | 16.9                    |
| Heart failure - (%)                     | 78.1            | 85.3           | 18.7                    |
| Pulmonary disease - (%)                 | 47.3            | 55.7           | 16.7                    |
| HIV positive - (%)                      | 3.2             | 4.6            | 7.3                     |
| Cancer - (%)                            | 9.7             | 11.8           | 6.8                     |
| Dementia - (%)                          | 15.3            | 18.0           | 7.1                     |
| Diabetes - (%)                          | 74.2            | 76.8           | 6.0                     |
| Liver disease - (%)                     | 17.8            | 24.4           | 16.2                    |
| Paralysis - (%)                         | 6.7             | 8.1            | 5.5                     |
| PVD - (%)                               | 46.5            | 51.8           | 10.6                    |
| Rheumatic disease - (%)                 | 6.2             | 6.9            | 2.9                     |
| <b>Acuity of care and facility</b>      |                 |                |                         |
| First year of hemodialysis - (%)        | 11.1            | 11.6           | 1.7                     |
| Duration of hosp. - (days)              | 9.0             | 10.4           | 11.4                    |
| Facility size - (# patients)            | 110.5           | 110.7          | 0.3                     |

Table S3: Evaluation of Instrument in For-Profit, Medicaid, Metropolitan Cohort

| Demographic                      | Physician Visits        |                         |            | Quartile of Facility Visits Instrumental Variable <sup>1</sup> |       |       |       |                             |
|----------------------------------|-------------------------|-------------------------|------------|----------------------------------------------------------------|-------|-------|-------|-----------------------------|
|                                  | 0-3 visits<br>(n=6,519) | 4+ visits<br>(n=14,444) | Std. diff. | 1st                                                            | 2nd   | 3rd   | 4th   | Std. diff.<br>(1st vs. 4th) |
| Males - (%)                      | 55.4                    | 58.5                    | 6.4        | 55.3                                                           | 56.1  | 58.5  | 61.6  | 12.6                        |
| Age - (years)                    | 58.7                    | 59.6                    | 6.3        | 59.9                                                           | 59.1  | 58.7  | 58.5  | 9.2                         |
| American Indian - (%)            | 0.9                     | 0.9                     | 0.1        | 1.3                                                            | 1.0   | 0.7   | 0.6   | 7.4                         |
| Black - (%)                      | 50.6                    | 49.9                    | 1.4        | 41.4                                                           | 53.3  | 53.3  | 53.6  | 24.7                        |
| White - (%)                      | 43.8                    | 44.7                    | 1.8        | 49.5                                                           | 40.9  | 42.3  | 44.1  | 10.8                        |
| Other race - (%)                 | 4.7                     | 4.5                     | 0.6        | 7.8                                                            | 4.7   | 3.7   | 1.6   | 29.2                        |
| Hispanic ethnicity - (%)         | 19.5                    | 21.9                    | 5.9        | 27.0                                                           | 19.8  | 17.2  | 19.1  | 18.8                        |
| Socioeconomic and co-morbidities |                         |                         |            |                                                                |       |       |       |                             |
| Alcohol use - (%)                | 6.9                     | 4.1                     | 12.3       | 5.2                                                            | 5.3   | 5.2   | 4.9   | 1.0                         |
| Drug use - (%)                   | 15.4                    | 9.5                     | 17.9       | 11.6                                                           | 12.4  | 11.7  | 11.0  | 1.8                         |
| Smokes - (%)                     | 19.8                    | 15.0                    | 12.7       | 14.9                                                           | 17.8  | 18.7  | 17.5  | 7.2                         |
| Cerebrovascular disease - (%)    | 45.7                    | 41.1                    | 9.4        | 43.9                                                           | 43.9  | 42.4  | 40.8  | 6.3                         |
| Peptic ulcer disease - (%)       | 36.0                    | 29.2                    | 14.4       | 31.5                                                           | 32.5  | 31.9  | 31.2  | 0.6                         |
| Coronary artery disease - (%)    | 40.8                    | 35.4                    | 11.1       | 39.2                                                           | 39.6  | 37.5  | 33.8  | 11.3                        |
| Heart failure - (%)              | 84.0                    | 79.5                    | 11.7       | 81.1                                                           | 82.4  | 81.8  | 79.1  | 5.1                         |
| Pulmonary disease - (%)          | 54.4                    | 48.7                    | 11.5       | 51.0                                                           | 51.4  | 51.2  | 49.6  | 2.9                         |
| HIV positive - (%)               | 4.3                     | 3.6                     | 3.5        | 3.7                                                            | 4.6   | 3.6   | 3.2   | 2.6                         |
| Cancer - (%)                     | 12.4                    | 10.1                    | 7.3        | 11.5                                                           | 10.7  | 10.8  | 9.3   | 7.1                         |
| Dementia - (%)                   | 19.7                    | 15.4                    | 11.3       | 16.4                                                           | 16.9  | 16.5  | 15.9  | 1.3                         |
| Diabetes - (%)                   | 75.1                    | 75.0                    | 0.5        | 76.6                                                           | 75.7  | 74.7  | 74.1  | 5.9                         |
| Liver disease - (%)              | 24.0                    | 18.9                    | 12.3       | 22.0                                                           | 21.0  | 20.3  | 18.8  | 7.8                         |
| Paralysis - (%)                  | 8.3                     | 6.7                     | 6.0        | 6.9                                                            | 7.5   | 7.7   | 7.1   | 0.5                         |
| PVD - (%)                        | 51.3                    | 47.6                    | 7.5        | 49.0                                                           | 50.0  | 48.0  | 47.8  | 2.4                         |
| Rheumatic disease - (%)          | 6.9                     | 6.1                     | 3.3        | 6.3                                                            | 5.9   | 6.3   | 7.2   | 3.6                         |
| Acuity of care and facility      |                         |                         |            |                                                                |       |       |       |                             |
| First year of hemodialysis - (%) | 13.0                    | 10.5                    | 7.9        | 12.3                                                           | 11.6  | 11.3  | 10.2  | 6.7                         |
| Duration of hosp. - (days)       | 12.0                    | 8.6                     | 24.9       | 9.6                                                            | 9.6   | 9.5   | 9.5   | 1.1                         |
| Facility size - (# patients)     | 107.3                   | 112.8                   | 9.9        | 111.4                                                          | 109.7 | 108.4 | 112.8 | 2.6                         |

<sup>1</sup> n = 5,240 for each quartile.

Table S4: Instrumental Variable Regression Results in For-Profit, Medicaid, Metropolitan Cohort

|                                              | Change in probability of<br>re-hospitalization | LCI         | UCI    |
|----------------------------------------------|------------------------------------------------|-------------|--------|
| Physician Visits (per 1 additional)          | -0.049                                         | -0.072      | -0.027 |
| Demographic & socioeconomic characteristics: |                                                |             |        |
| Male sex                                     | -0.008                                         | -0.020      | 0.004  |
| Age (10 years)                               | -0.019                                         | -0.024      | -0.015 |
| White                                        |                                                | (reference) |        |
| American Indian                              | 0.028                                          | -0.032      | 0.089  |
| Black                                        | 0.016                                          | 0.002       | 0.031  |
| Other race                                   | 0.005                                          | -0.024      | 0.034  |
| Hispanic ethnicity                           | -0.018                                         | -0.035      | -0.001 |
| Alcohol use                                  | 0.025                                          | -0.005      | 0.054  |
| Drug use                                     | 0.104                                          | 0.083       | 0.125  |
| Smoking history                              | 0.053                                          | 0.035       | 0.070  |
| Co-morbidities:                              |                                                |             |        |
| Cerebrovascular disease                      | 0.023                                          | 0.010       | 0.036  |
| Peptic ulcer disease                         | 0.046                                          | 0.033       | 0.059  |
| Coronary artery disease                      | 0.046                                          | 0.033       | 0.059  |
| Heart failure                                | 0.066                                          | 0.050       | 0.081  |
| Pulmonary disease                            | 0.039                                          | 0.026       | 0.051  |
| HIV                                          | 0.025                                          | -0.007      | 0.057  |
| Cancer                                       | 0.045                                          | 0.026       | 0.065  |
| Dementia                                     | 0.036                                          | 0.019       | 0.053  |
| Diabetes                                     | 0.046                                          | 0.031       | 0.061  |
| Liver disease                                | 0.042                                          | 0.026       | 0.057  |
| Paralysis                                    | 0.014                                          | -0.010      | 0.037  |
| Peripheral vascular disease                  | 0.032                                          | 0.020       | 0.044  |
| Rheumatic disease                            | 0.010                                          | -0.014      | 0.035  |
| Acuity of illness:                           |                                                |             |        |
| First year of dialysis                       | 0.012                                          | -0.006      | 0.031  |
| Duration of hospitalization (days)           | 0.002                                          | 0.001       | 0.002  |
| Facility Characteristics                     |                                                |             |        |
| Facility size (25 patient difference)        | 0.002                                          | -0.001      | 0.004  |

Table S5: First-Stage Instrumental Variable Regression Results for For-Profit, Medicaid, Metropolitan Cohort

|                                              | Change in Provider<br>Visits/Month | LCI         | UCI    |
|----------------------------------------------|------------------------------------|-------------|--------|
| One additional mean visit at facility        | 0.461                              | 0.428       | 0.494  |
| Demographic & socioeconomic characteristics: |                                    |             |        |
| Male sex                                     | -0.048                             | -0.088      | -0.008 |
| Age (10 years)                               | 0.039                              | 0.024       | 0.053  |
| White                                        |                                    | (reference) |        |
| Native American                              | 0.096                              | -0.102      | 0.294  |
| Black                                        | 0.028                              | -0.019      | 0.074  |
| Other race                                   | 0.033                              | -0.060      | 0.127  |
| Hispanic ethnicity                           | 0.040                              | -0.014      | 0.094  |
| Alcohol use                                  | -0.158                             | -0.261      | -0.055 |
| Drug use                                     | 0.006                              | -0.068      | 0.080  |
| Smoking history                              | -0.061                             | -0.119      | -0.002 |
| Co-morbidities:                              |                                    |             |        |
| Cerebrovascular disease                      | -0.010                             | -0.051      | 0.032  |
| Peptic ulcer disease                         | -0.039                             | -0.082      | 0.004  |
| Coronary artery disease                      | -0.011                             | -0.052      | 0.031  |
| Heart failure                                | -0.003                             | -0.051      | 0.045  |
| Pulmonary disease                            | -0.015                             | -0.055      | 0.025  |
| HIV                                          | 0.034                              | -0.077      | 0.145  |
| Cancer                                       | 0.069                              | 0.003       | 0.135  |
| Dementia                                     | -0.020                             | -0.076      | 0.037  |
| Diabetes                                     | 0.066                              | 0.020       | 0.113  |
| Liver disease                                | 0.010                              | -0.041      | 0.062  |
| Paralysis                                    | -0.054                             | -0.132      | 0.025  |
| Peripheral vascular disease                  | 0.018                              | -0.022      | 0.057  |
| Rheumatic disease                            | -0.014                             | -0.094      | 0.065  |
| Acuity of illness:                           |                                    |             |        |
| First year of dialysis                       | -0.068                             | -0.128      | -0.009 |
| Duration of hospitalization (days)           | -0.007                             | -0.008      | -0.005 |
| Facility Characteristics                     |                                    |             |        |
| Facility size (25 patient difference)        | 0.017                              | 0.009       | 0.026  |

Table S6: Baseline Characteristics in For-Profit, Non-Medicaid, Non-Metropolitan Cohort

|                                         | Re-hospitalized |               | Standardized Difference |
|-----------------------------------------|-----------------|---------------|-------------------------|
|                                         | No (n=3,739)    | Yes (n=1,906) |                         |
| <b>Demographic</b>                      |                 |               |                         |
| Males - (%)                             | 43.3            | 43.8          | 1.0                     |
| Age - (years)                           | 68.7            | 67.8          | 7.1                     |
| American Indian - (%)                   | 2.6             | 2.5           | 0.3                     |
| Black - (%)                             | 22.5            | 23.3          | 1.8                     |
| White - (%)                             | 74.5            | 73.8          | 1.6                     |
| Other race - (%)                        | 0.4             | 0.4           | 0.1                     |
| Hispanic ethnicity - (%)                | 5.0             | 4.4           | 3.0                     |
| <b>Socioeconomic and co-morbidities</b> |                 |               |                         |
| Alcohol use - (%)                       | 1.4             | 2.1           | 5.4                     |
| Drug use - (%)                          | 4.1             | 5.2           | 5.1                     |
| Smokes - (%)                            | 8.5             | 13.3          | 15.4                    |
| Cerebrovascular disease - (%)           | 38.5            | 43.5          | 10.2                    |
| Peptic ulcer disease - (%)              | 24.7            | 30.8          | 13.7                    |
| Coronary artery disease - (%)           | 34.3            | 39.7          | 11.3                    |
| Heart failure - (%)                     | 77.6            | 82.3          | 11.7                    |
| Pulmonary disease - (%)                 | 49.7            | 54.8          | 10.2                    |
| HIV positive - (%)                      | 0.2             | 0.3           | 1.4                     |
| Cancer - (%)                            | 13.4            | 17.1          | 10.4                    |
| Dementia - (%)                          | 14.0            | 15.6          | 4.6                     |
| Diabetes - (%)                          | 70.4            | 70.7          | 0.7                     |
| Liver disease - (%)                     | 9.3             | 12.5          | 10.5                    |
| Paralysis - (%)                         | 4.8             | 4.9           | 0.8                     |
| PVD - (%)                               | 46.6            | 52.5          | 11.9                    |
| Rheumatic disease - (%)                 | 3.7             | 6.6           | 13.1                    |
| <b>Acuity of care and facility</b>      |                 |               |                         |
| First year of hemodialysis - (%)        | 14.5            | 15.1          | 1.7                     |
| Duration of hosp. - (days)              | 8.7             | 10.1          | 13.6                    |
| Facility size - (# patients)            | 62.4            | 63.3          | 2.7                     |

Table S7: Evaluation of Instrument in For-Profit, Non-Medicaid, Non-Metropolitan Cohort

| Demographic                      | Physician Visits        |                        |            | Quartile of Facility Visits Instrumental Variable <sup>1</sup> |      |      |      |                             |
|----------------------------------|-------------------------|------------------------|------------|----------------------------------------------------------------|------|------|------|-----------------------------|
|                                  | 0-3 visits<br>(n=1,381) | 4+ visits<br>(n=2,768) | Std. diff. | 1st                                                            | 2nd  | 3rd  | 4th  | Std. diff.<br>(1st vs. 4th) |
| Males - (%)                      | 43.7                    | 42.8                   | 1.9        | 43.6                                                           | 42.7 | 45.5 | 42.3 | 2.6                         |
| Age - (years)                    | 69.0                    | 68.4                   | 5.8        | 69.0                                                           | 68.0 | 68.1 | 68.5 | 0.4                         |
| American Indian - (%)            | 3.5                     | 2.3                    | 7.6        | 3.6                                                            | 2.3  | 1.8  | 2.5  | 6.6                         |
| Black - (%)                      | 20.1                    | 24.2                   | 10.1       | 15.0                                                           | 21.4 | 26.6 | 28.2 | 32.4                        |
| White - (%)                      | 76.1                    | 73.0                   | 7.1        | 80.5                                                           | 76.1 | 71.5 | 68.9 | 26.7                        |
| Other race - (%)                 | 0.3                     | 0.5                    | 2.9        | 0.9                                                            | 0.1  | 0.2  | 0.4  | 6.1                         |
| Hispanic ethnicity - (%)         | 5.1                     | 4.4                    | 3.6        | 7.2                                                            | 3.8  | 4.2  | 4.0  | 14.1                        |
| Socioeconomic and co-morbidities |                         |                        |            |                                                                |      |      |      |                             |
| Alcohol use - (%)                | 1.8                     | 1.4                    | 3.2        | 1.2                                                            | 2.0  | 1.3  | 2.0  | 6.2                         |
| Drug use - (%)                   | 4.5                     | 4.0                    | 2.2        | 4.0                                                            | 4.5  | 4.5  | 4.9  | 4.5                         |
| Smokes - (%)                     | 10.3                    | 9.4                    | 3.0        | 9.8                                                            | 11.3 | 11.0 | 8.4  | 4.9                         |
| Cerebrovascular disease - (%)    | 42.9                    | 38.2                   | 9.5        | 38.5                                                           | 41.7 | 41.6 | 38.9 | 1.0                         |
| Peptic ulcer disease - (%)       | 27.0                    | 26.5                   | 1.1        | 24.9                                                           | 27.4 | 26.8 | 27.9 | 6.7                         |
| Coronary artery disease - (%)    | 36.2                    | 35.7                   | 1.1        | 35.6                                                           | 38.8 | 33.9 | 36.1 | 1.0                         |
| Heart failure - (%)              | 78.8                    | 79.2                   | 1.0        | 77.6                                                           | 82.6 | 79.7 | 77.0 | 1.4                         |
| Pulmonary disease - (%)          | 53.7                    | 50.5                   | 6.3        | 52.8                                                           | 52.5 | 53.3 | 47.2 | 11.4                        |
| HIV positive - (%)               | 0.4                     | 0.3                    | 1.3        | 0.1                                                            | 0.3  | 0.4  | 0.2  | 1.7                         |
| Cancer - (%)                     | 14.6                    | 13.5                   | 2.9        | 15.4                                                           | 14.2 | 14.1 | 14.8 | 1.5                         |
| Dementia - (%)                   | 16.7                    | 13.3                   | 9.3        | 13.4                                                           | 15.0 | 14.4 | 15.3 | 5.5                         |
| Diabetes - (%)                   | 71.4                    | 70.4                   | 2.2        | 71.2                                                           | 72.8 | 69.9 | 67.9 | 7.2                         |
| Liver disease - (%)              | 11.7                    | 9.4                    | 7.7        | 11.0                                                           | 9.9  | 11.2 | 9.4  | 5.6                         |
| Paralysis - (%)                  | 5.1                     | 4.4                    | 3.1        | 4.3                                                            | 4.9  | 5.6  | 4.5  | 0.7                         |
| PVD - (%)                        | 50.2                    | 47.3                   | 5.9        | 47.1                                                           | 50.7 | 48.9 | 47.5 | 0.8                         |
| Rheumatic disease - (%)          | 5.5                     | 3.9                    | 7.4        | 5.0                                                            | 4.7  | 4.5  | 4.5  | 2.3                         |
| Acuity of care and facility      |                         |                        |            |                                                                |      |      |      |                             |
| First year of hemodialysis - (%) | 16.1                    | 14.1                   | 5.7        | 14.7                                                           | 15.2 | 15.3 | 13.4 | 3.8                         |
| Duration of hosp. - (days)       | 10.2                    | 8.4                    | 22.5       | 8.9                                                            | 9.1  | 9.3  | 9.3  | 0.6                         |
| Facility size - (# patients)     | 57.4                    | 66.3                   | 14.3       | 53.0                                                           | 59.5 | 68.0 | 70.2 | 11.4                        |

<sup>1</sup> n=1,037 per quartile.

Table S8: Instrumental Variable Regression Results in For-Profit, Non-Medicaid, Non-Metropolitan Cohort

|                                              | Change in probability<br>of re-hospitalization | LCI         | UCI    |
|----------------------------------------------|------------------------------------------------|-------------|--------|
| Physician Visits (per 1 additional)          | -0.016                                         | -0.042      | 0.009  |
| Demographic & socioeconomic characteristics: |                                                |             |        |
| Male sex                                     | 0.013                                          | -0.012      | 0.039  |
| Age (10 years)                               | -0.013                                         | -0.024      | -0.001 |
| White                                        |                                                | (reference) |        |
| American Indian                              | 0.000                                          | -0.079      | 0.079  |
| Black                                        | 0.008                                          | -0.024      | 0.039  |
| Other race                                   | 0.020                                          | -0.174      | 0.215  |
| Hispanic ethnicity                           | -0.045                                         | -0.103      | 0.013  |
| Alcohol use                                  | 0.028                                          | -0.077      | 0.133  |
| Drug use                                     | 0.024                                          | -0.038      | 0.086  |
| Smoking history                              | 0.093                                          | 0.048       | 0.138  |
| Co-morbidities:                              |                                                |             |        |
| Cerebrovascular disease                      | 0.028                                          | 0.001       | 0.055  |
| Peptic ulcer disease                         | 0.045                                          | 0.016       | 0.075  |
| Coronary artery disease                      | 0.028                                          | 0.000       | 0.055  |
| Heart failure                                | 0.035                                          | 0.003       | 0.068  |
| Pulmonary disease                            | 0.019                                          | -0.007      | 0.046  |
| HIV                                          | 0.113                                          | -0.173      | 0.399  |
| Cancer                                       | 0.068                                          | 0.032       | 0.105  |
| Dementia                                     | 0.018                                          | -0.019      | 0.055  |
| Diabetes                                     | -0.001                                         | -0.029      | 0.027  |
| Liver disease                                | 0.050                                          | 0.007       | 0.092  |
| Paralysis                                    | -0.022                                         | -0.082      | 0.037  |
| Peripheral vascular disease                  | 0.037                                          | 0.010       | 0.063  |
| Rheumatic disease                            | 0.139                                          | 0.077       | 0.202  |
| Acuity of illness:                           |                                                |             |        |
| First year of dialysis                       | 0.007                                          | -0.029      | 0.042  |
| Duration of hospitalization (days)           | 0.003                                          | 0.001       | 0.004  |
| Facility Characteristics                     |                                                |             |        |
| Facility size (25 patient difference)        | 0.007                                          | -0.004      | 0.018  |



Table S9: First-Stage Instrumental Variable Regression Results for For-Profit, Non-Medicaid, Non-Metropolitan Cohort

|                                              | Change in Provider<br>Visits/Month | LCI         | UCI    |
|----------------------------------------------|------------------------------------|-------------|--------|
| One additional mean visit at facility        | 0.832                              | 0.766       | 0.898  |
| Demographic & socioeconomic characteristics: |                                    |             |        |
| Male sex                                     | -0.030                             | -0.110      | 0.050  |
| Age (10 years)                               | 0.012                              | -0.025      | 0.049  |
| White                                        |                                    | (reference) |        |
| Native American                              | -0.022                             | -0.272      | 0.229  |
| Black                                        | -0.002                             | -0.103      | 0.098  |
| Other race                                   | 0.489                              | -0.105      | 1.084  |
| Hispanic ethnicity                           | -0.109                             | -0.291      | 0.072  |
| Alcohol use                                  | -0.029                             | -0.378      | 0.320  |
| Drug use                                     | -0.086                             | -0.286      | 0.113  |
| Smoking history                              | 0.024                              | -0.122      | 0.170  |
| Co-morbidities:                              |                                    |             |        |
| Cerebrovascular disease                      | -0.013                             | -0.099      | 0.073  |
| Peptic ulcer disease                         | 0.073                              | -0.019      | 0.166  |
| Coronary artery disease                      | 0.026                              | -0.061      | 0.112  |
| Heart failure                                | 0.157                              | 0.058       | 0.257  |
| Pulmonary disease                            | 0.059                              | -0.024      | 0.142  |
| HIV                                          | 0.413                              | -0.455      | 1.281  |
| Cancer                                       | 0.099                              | -0.019      | 0.217  |
| Dementia                                     | -0.075                             | -0.196      | 0.045  |
| Diabetes                                     | 0.009                              | -0.081      | 0.099  |
| Liver disease                                | 0.098                              | -0.042      | 0.239  |
| Paralysis                                    | 0.043                              | -0.151      | 0.237  |
| Peripheral vascular disease                  | 0.013                              | -0.069      | 0.094  |
| Rheumatic disease                            | -0.237                             | -0.441      | -0.033 |
| Acuity of illness:                           |                                    |             |        |
| First year of dialysis                       | -0.114                             | -0.225      | -0.003 |
| Duration of hospitalization (days)           | -0.011                             | -0.015      | -0.007 |
| Facility Characteristics                     |                                    |             |        |
| Facility size (25 patient difference)        | 0.020                              | -0.014      | 0.054  |

Table S10: Baseline Characteristics in For-Profit, Medicaid, Non-Metropolitan Cohort

|                                         | Re-hospitalized |               | Standardized Difference |
|-----------------------------------------|-----------------|---------------|-------------------------|
|                                         | No (n=4,288)    | Yes (n=2,422) |                         |
| <b>Demographic</b>                      |                 |               |                         |
| Males - (%)                             | 61.7            | 59.5          | 4.5                     |
| Age - (years)                           | 60.0            | 58.9          | 7.4                     |
| American Indian - (%)                   | 5.0             | 4.6           | 1.8                     |
| Black - (%)                             | 48.0            | 47.4          | 1.2                     |
| White - (%)                             | 46.2            | 47.4          | 2.4                     |
| Other race - (%)                        | 0.8             | 0.6           | 2.9                     |
| Hispanic ethnicity - (%)                | 10.2            | 8.6           | 5.3                     |
| <b>Socioeconomic and co-morbidities</b> |                 |               |                         |
| Alcohol use - (%)                       | 3.3             | 5.0           | 8.6                     |
| Drug use - (%)                          | 6.4             | 10.3          | 14.1                    |
| Smokes - (%)                            | 15.5            | 20.3          | 12.5                    |
| Cerebrovascular disease - (%)           | 36.2            | 42.9          | 13.9                    |
| Peptic ulcer disease - (%)              | 26.5            | 33.4          | 15.0                    |
| Coronary artery disease - (%)           | 30.7            | 36.6          | 12.5                    |
| Heart failure - (%)                     | 77.5            | 83.9          | 16.1                    |
| Pulmonary disease - (%)                 | 48.6            | 58.4          | 19.6                    |
| HIV positive - (%)                      | 1.2             | 1.9           | 5.7                     |
| Cancer - (%)                            | 8.9             | 9.9           | 3.5                     |
| Dementia - (%)                          | 13.7            | 17.4          | 10.3                    |
| Diabetes - (%)                          | 74.6            | 77.2          | 6.2                     |
| Liver disease - (%)                     | 11.4            | 15.4          | 11.8                    |
| Paralysis - (%)                         | 6.3             | 7.2           | 3.9                     |
| PVD - (%)                               | 45.0            | 51.5          | 13.1                    |
| Rheumatic disease - (%)                 | 5.0             | 5.4           | 1.6                     |
| <b>Acuity of care and facility</b>      |                 |               |                         |
| First year of hemodialysis - (%)        | 12.3            | 13.3          | 3.0                     |
| Duration of hosp. - (days)              | 8.6             | 10.0          | 12.3                    |
| Facility size - (# patients)            | 67.8            | 68.1          | 0.9                     |

Table S11: Evaluation of Instrument in For-Profit, Medicaid, Non-Metropolitan Cohort

| Demographic                      | Physician Visits        |                        |            | Quartile of Facility Visits Instrumental Variable <sup>1</sup> |      |      |      |                             |
|----------------------------------|-------------------------|------------------------|------------|----------------------------------------------------------------|------|------|------|-----------------------------|
|                                  | 0-3 visits<br>(n=1,553) | 4+ visits<br>(n=3,337) | Std. diff. | 1st                                                            | 2nd  | 3rd  | 4th  | Std. diff.<br>(1st vs. 4th) |
| Males - (%)                      | 60.8                    | 61.3                   | 1.1        | 57.7                                                           | 60.6 | 62.8 | 62.5 | 9.9                         |
| Age - (years)                    | 59.5                    | 59.5                   | 6.3        | 59.5                                                           | 59.4 | 59.9 | 59.5 | 9.2                         |
| American Indian - (%)            | 7.4                     | 3.3                    | 18.3       | 9.5                                                            | 4.3  | 2.7  | 2.8  | 28.2                        |
| Black - (%)                      | 41.7                    | 51.7                   | 20.2       | 31.4                                                           | 46.2 | 55.9 | 57.7 | 55.0                        |
| White - (%)                      | 50.0                    | 44.3                   | 11.5       | 57.6                                                           | 48.9 | 40.9 | 39.1 | 37.7                        |
| Other race - (%)                 | 0.9                     | 0.7                    | 2.0        | 1.5                                                            | 0.5  | 0.5  | 0.4  | 11.8                        |
| Hispanic ethnicity - (%)         | 9.8                     | 9.4                    | 1.4        | 13.0                                                           | 8.9  | 6.7  | 10.0 | 9.2                         |
| Socioeconomic and co-morbidities |                         |                        |            |                                                                |      |      |      |                             |
| Alcohol use - (%)                | 4.8                     | 3.5                    | 6.5        | 3.9                                                            | 4.8  | 4.3  | 2.7  | 6.3                         |
| Drug use - (%)                   | 9.5                     | 6.8                    | 10.0       | 7.9                                                            | 8.3  | 8.8  | 6.2  | 6.5                         |
| Smokes - (%)                     | 19.7                    | 15.0                   | 12.4       | 18.9                                                           | 18.1 | 16.9 | 15.2 | 9.9                         |
| Cerebrovascular disease - (%)    | 42.0                    | 36.2                   | 11.9       | 37.7                                                           | 39.7 | 39.9 | 37.2 | 1.0                         |
| Peptic ulcer disease - (%)       | 32.6                    | 27.3                   | 11.6       | 28.9                                                           | 28.4 | 30.6 | 28.3 | 1.3                         |
| Coronary artery disease - (%)    | 34.2                    | 32.4                   | 3.9        | 34.9                                                           | 33.5 | 32.2 | 30.8 | 8.7                         |
| Heart failure - (%)              | 80.7                    | 78.8                   | 4.7        | 79.4                                                           | 79.8 | 81.1 | 79.1 | 0.7                         |
| Pulmonary disease - (%)          | 54.3                    | 50.5                   | 7.8        | 55.0                                                           | 53.0 | 51.1 | 49.5 | 11.2                        |
| HIV positive - (%)               | 1.8                     | 1.3                    | 3.7        | 0.7                                                            | 2.0  | 1.5  | 1.4  | 7.0                         |
| Cancer - (%)                     | 11.7                    | 8.1                    | 12.1       | 9.0                                                            | 9.6  | 9.5  | 8.9  | 0.3                         |
| Dementia - (%)                   | 18.2                    | 13.9                   | 11.7       | 14.0                                                           | 14.9 | 17.9 | 13.4 | 2.0                         |
| Diabetes - (%)                   | 74.5                    | 74.8                   | 0.8        | 78.2                                                           | 74.5 | 76.1 | 73.3 | 11.4                        |
| Liver disease - (%)              | 15.1                    | 12.2                   | 8.4        | 13.1                                                           | 14.2 | 13.2 | 11.0 | 6.3                         |
| Paralysis - (%)                  | 8.8                     | 5.3                    | 13.6       | 7.3                                                            | 6.8  | 5.7  | 6.6  | 2.5                         |
| PVD - (%)                        | 46.9                    | 46.5                   | 0.7        | 48.1                                                           | 48.3 | 46.8 | 46.2 | 3.8                         |
| Rheumatic disease - (%)          | 5.9                     | 5.3                    | 2.6        | 4.9                                                            | 5.9  | 4.5  | 5.3  | 1.7                         |
| Acuity of care and facility      |                         |                        |            |                                                                |      |      |      |                             |
| First year of hemodialysis - (%) | 13.5                    | 11.7                   | 5.3        | 14.0                                                           | 13.3 | 13.1 | 10.1 | 12.0                        |
| Duration of hosp. - (days)       | 11.5                    | 8.1                    | 24.9       | 9.5                                                            | 8.9  | 9.3  | 8.7  | 1.1                         |
| Facility size - (# patients)     | 61.4                    | 72.3                   | 9.9        | 55.2                                                           | 63.3 | 73.5 | 79.6 | 2.6                         |

<sup>1</sup> n=1,222 per quartile.

Table S12: Instrumental Variable Regression Results in For-Profit, Medicaid, Non-Metropolitan Cohort

|                                              | Change in probability of<br>re-hospitalization | LCI         | UCI    |
|----------------------------------------------|------------------------------------------------|-------------|--------|
| Physician Visits (per 1 additional)          | -0.005                                         | -0.030      | 0.020  |
| Demographic & socioeconomic characteristics: |                                                |             |        |
| Male sex                                     | -0.006                                         | -0.030      | 0.019  |
| Age (10 years)                               | -0.018                                         | -0.027      | -0.009 |
| White                                        |                                                | (reference) |        |
| American Indian                              | -0.008                                         | -0.067      | 0.052  |
| Black                                        | -0.008                                         | -0.034      | 0.018  |
| Other race                                   | -0.074                                         | -0.211      | 0.062  |
| Hispanic ethnicity                           | -0.040                                         | -0.082      | 0.001  |
| Alcohol use                                  | 0.026                                          | -0.038      | 0.090  |
| Drug use                                     | 0.055                                          | 0.006       | 0.103  |
| Smoking history                              | 0.032                                          | -0.002      | 0.066  |
| Co-morbidities:                              |                                                |             |        |
| Cerebrovascular disease                      | 0.033                                          | 0.007       | 0.059  |
| Peptic ulcer disease                         | 0.047                                          | 0.021       | 0.074  |
| Coronary artery disease                      | 0.022                                          | -0.004      | 0.048  |
| Heart failure                                | 0.044                                          | 0.014       | 0.074  |
| Pulmonary disease                            | 0.061                                          | 0.036       | 0.086  |
| HIV                                          | 0.095                                          | -0.013      | 0.202  |
| Cancer                                       | 0.021                                          | -0.019      | 0.061  |
| Dementia                                     | 0.053                                          | 0.018       | 0.088  |
| Diabetes                                     | 0.022                                          | -0.007      | 0.052  |
| Liver disease                                | 0.039                                          | 0.002       | 0.077  |
| Paralysis                                    | 0.010                                          | -0.039      | 0.059  |
| Peripheral vascular disease                  | 0.042                                          | 0.017       | 0.067  |
| Rheumatic disease                            | 0.004                                          | -0.052      | 0.059  |
| Acuity of illness:                           |                                                |             |        |
| First year of dialysis                       | 0.021                                          | -0.014      | 0.056  |
| Duration of hospitalization (days)           | 0.002                                          | 0.001       | 0.003  |
| Facility Characteristics                     |                                                |             |        |
| Facility size (25 patient difference)        | 0.002                                          | -0.008      | 0.012  |

Table S13: First-Stage Instrumental Variable Regression Results for For-Profit, Medicaid, Non-Metropolitan Cohort

|                                              | Change in Provider<br>Visits/Month | LCI         | UCI    |
|----------------------------------------------|------------------------------------|-------------|--------|
| One additional mean visit at facility        | 0.833                              | 0.770       | 0.896  |
| Demographic & socioeconomic characteristics: |                                    |             |        |
| Male sex                                     | -0.054                             | -0.127      | 0.019  |
| Age (10 years)                               | 0.003                              | -0.023      | 0.029  |
| White                                        |                                    | (reference) |        |
| Native American                              | -0.164                             | -0.334      | 0.005  |
| Black                                        | -0.017                             | -0.095      | 0.061  |
| Other race                                   | 0.428                              | 0.024       | 0.832  |
| Hispanic ethnicity                           | -0.018                             | -0.142      | 0.106  |
| Alcohol use                                  | 0.097                              | -0.103      | 0.297  |
| Drug use                                     | -0.022                             | -0.170      | 0.127  |
| Smoking history                              | -0.122                             | -0.223      | -0.021 |
| Co-morbidities:                              |                                    |             |        |
| Cerebrovascular disease                      | 0.042                              | -0.036      | 0.119  |
| Peptic ulcer disease                         | -0.066                             | -0.145      | 0.014  |
| Coronary artery disease                      | -0.006                             | -0.084      | 0.072  |
| Heart failure                                | -0.003                             | -0.090      | 0.085  |
| Pulmonary disease                            | 0.035                              | -0.039      | 0.108  |
| HIV                                          | 0.118                              | -0.215      | 0.452  |
| Cancer                                       | -0.149                             | -0.272      | -0.026 |
| Dementia                                     | 0.054                              | -0.054      | 0.161  |
| Diabetes                                     | 0.062                              | -0.024      | 0.147  |
| Liver disease                                | 0.016                              | -0.097      | 0.128  |
| Paralysis                                    | -0.117                             | -0.265      | 0.031  |
| Peripheral vascular disease                  | 0.040                              | -0.032      | 0.113  |
| Rheumatic disease                            | 0.004                              | -0.156      | 0.164  |
| Acuity of illness:                           |                                    |             |        |
| First year of dialysis                       | -0.026                             | -0.130      | 0.078  |
| Duration of hospitalization (days)           | -0.004                             | -0.007      | 0.000  |
| Facility Characteristics                     |                                    |             |        |
| Facility size (25 patient difference)        | 0.042                              | 0.013       | 0.071  |

Table S14: Baseline Characteristics in Nonprofit Cohort

|                                         | Re-hospitalized |               | Standardized Difference |
|-----------------------------------------|-----------------|---------------|-------------------------|
|                                         | No (n=12,270)   | Yes (n=7,957) |                         |
| <b>Demographic</b>                      |                 |               |                         |
| Males - (%)                             | 49.5            | 49.2          | 0.8                     |
| Age - (years)                           | 64.1            | 61.9          | 14.4                    |
| American Indian - (%)                   | 2.0             | 1.6           | 3.2                     |
| Black - (%)                             | 38.0            | 44.1          | 12.5                    |
| White - (%)                             | 56.3            | 50.6          | 11.3                    |
| Other race - (%)                        | 3.7             | 3.6           | 0.3                     |
| Hispanic ethnicity - (%)                | 9.2             | 9.3           | 0.1                     |
| <b>Socioeconomic and co-morbidities</b> |                 |               |                         |
| Alcohol use - (%)                       | 3.5             | 5.4           | 9.4                     |
| Drug use - (%)                          | 6.5             | 11.8          | 18.3                    |
| Smokes - (%)                            | 11.0            | 14.4          | 10.1                    |
| Cerebrovascular disease - (%)           | 36.6            | 43.3          | 13.6                    |
| Peptic ulcer disease - (%)              | 26.2            | 34.6          | 18.4                    |
| Coronary artery disease - (%)           | 34.1            | 42.3          | 17.0                    |
| Heart failure - (%)                     | 75.3            | 82.3          | 17.1                    |
| Pulmonary disease - (%)                 | 45.5            | 53.4          | 15.8                    |
| HIV positive - (%)                      | 2.5             | 3.3           | 5.2                     |
| Cancer - (%)                            | 12.9            | 14.7          | 5.1                     |
| Dementia - (%)                          | 13.8            | 16.1          | 6.3                     |
| Diabetes - (%)                          | 68.8            | 72.9          | 9.1                     |
| Liver disease - (%)                     | 20.1            | 25.5          | 12.8                    |
| Paralysis - (%)                         | 5.2             | 7.1           | 8.0                     |
| PVD - (%)                               | 49.0            | 53.6          | 9.3                     |
| Rheumatic disease - (%)                 | 5.0             | 6.1           | 4.8                     |
| <b>Acuity of care and facility</b>      |                 |               |                         |
| First year of hemodialysis - (%)        | 10.5            | 11.1          | 1.9                     |
| Duration of hosp. - (days)              | 9.0             | 10.6          | 13.2                    |
| Facility size - (# patients)            | 99.0            | 98.5          | 0.6                     |

Table S15: Evaluation of Instrument in Nonprofit Cohort

| Demographic                      | Physician Visits        |                         |            | Quartile of Facility Visits Instrumental Variable <sup>1</sup> |      |       |      |                             |
|----------------------------------|-------------------------|-------------------------|------------|----------------------------------------------------------------|------|-------|------|-----------------------------|
|                                  | 0-3 visits<br>(n=4,735) | 4+ visits<br>(n=10,698) | Std. diff. | 1st                                                            | 2nd  | 3rd   | 4th  | Std. diff.<br>(1st vs. 4th) |
| Males - (%)                      | 48.5                    | 49.8                    | 2.6        | 48.4                                                           | 49.1 | 48.3  | 51.8 | 6.8                         |
| Age - (years)                    | 63.2                    | 63.6                    | 1.7        | 62.6                                                           | 63.5 | 63.4  | 63.5 | 9.2                         |
| American Indian - (%)            | 2.0                     | 1.6                     | 3.2        | 2.3                                                            | 1.5  | 1.4   | 2.1  | 1.7                         |
| Black - (%)                      | 39.4                    | 40.7                    | 2.7        | 38.4                                                           | 44.7 | 40.5  | 38.1 | 0.7                         |
| White - (%)                      | 54.3                    | 54.1                    | 0.2        | 51.9                                                           | 49.7 | 56.0  | 58.7 | 13.6                        |
| Other race - (%)                 | 4.3                     | 3.5                     | 4.0        | 7.3                                                            | 4.1  | 2.1   | 1.2  | 31.1                        |
| Hispanic ethnicity - (%)         | 9.0                     | 9.4                     | 1.4        | 12.8                                                           | 11.5 | 7.6   | 5.0  | 27.4                        |
| Socioeconomic and co-morbidities |                         |                         |            |                                                                |      |       |      |                             |
| Alcohol use - (%)                | 5.2                     | 3.5                     | 8.3        | 4.8                                                            | 4.3  | 4.1   | 3.6  | 5.8                         |
| Drug use - (%)                   | 11.3                    | 7.0                     | 15.0       | 9.7                                                            | 9.0  | 8.4   | 7.2  | 9.3                         |
| Smokes - (%)                     | 12.9                    | 11.5                    | 4.2        | 12.8                                                           | 12.5 | 11.6  | 12.6 | 0.5                         |
| Cerebrovascular disease - (%)    | 41.4                    | 37.9                    | 7.1        | 38.2                                                           | 41.4 | 39.4  | 38.1 | 0.1                         |
| Peptic ulcer disease - (%)       | 31.2                    | 28.6                    | 5.7        | 30.1                                                           | 30.9 | 28.3  | 28.9 | 2.8                         |
| Coronary artery disease - (%)    | 39.1                    | 37.0                    | 4.3        | 38.9                                                           | 39.9 | 36.9  | 33.5 | 11.2                        |
| Heart failure - (%)              | 80.5                    | 76.9                    | 8.9        | 77.6                                                           | 78.0 | 79.6  | 77.0 | 1.4                         |
| Pulmonary disease - (%)          | 50.9                    | 46.8                    | 8.1        | 47.1                                                           | 48.1 | 50.4  | 48.9 | 3.6                         |
| HIV positive - (%)               | 3.3                     | 2.6                     | 4.4        | 2.8                                                            | 3.5  | 2.9   | 1.9  | 5.6                         |
| Cancer - (%)                     | 15.2                    | 13.0                    | 6.3        | 13.5                                                           | 14.0 | 14.2  | 12.8 | 2.2                         |
| Dementia - (%)                   | 16.6                    | 14.0                    | 7.3        | 14.3                                                           | 15.8 | 15.3  | 13.6 | 2.0                         |
| Diabetes - (%)                   | 70.5                    | 70.2                    | 0.6        | 69.7                                                           | 70.4 | 70.4  | 71.2 | 3.3                         |
| Liver disease - (%)              | 22.9                    | 22.1                    | 1.9        | 20.2                                                           | 23.8 | 22.6  | 22.4 | 5.3                         |
| Paralysis - (%)                  | 6.9                     | 5.6                     | 5.4        | 6.2                                                            | 6.1  | 6.4   | 5.0  | 5.4                         |
| PVD - (%)                        | 49.9                    | 50.9                    | 2.0        | 49.0                                                           | 51.0 | 53.0  | 50.2 | 2.4                         |
| Rheumatic disease - (%)          | 5.4                     | 5.2                     | 0.6        | 5.5                                                            | 5.1  | 6.2   | 4.9  | 2.7                         |
| Acuity of care and facility      |                         |                         |            |                                                                |      |       |      |                             |
| First year of hemodialysis - (%) | 12.1                    | 10.0                    | 6.7        | 10.3                                                           | 11.4 | 10.5  | 10.6 | 1.1                         |
| Duration of hosp. - (days)       | 12.0                    | 8.8                     | 2.9        | 9.4                                                            | 9.5  | 10.1  | 9.5  | 1.1                         |
| Facility size - (# patients)     | 99.9                    | 98.6                    | 0.5        | 108.4                                                          | 93.6 | 101.0 | 92.2 | 2.6                         |

<sup>1</sup> n=3,858 per quartile.

Table S16: Instrumental Variable Regression Results in Nonprofit Cohort

|                                              | Change in probability of<br>re-hospitalization | LCI         | UCI    |
|----------------------------------------------|------------------------------------------------|-------------|--------|
| Physician Visits (per 1 additional)          | -0.036                                         | -0.055      | -0.017 |
| Demographic & socioeconomic characteristics: |                                                |             |        |
| Male sex                                     | 0.000                                          | -0.014      | 0.014  |
| Age (10 years)                               | -0.021                                         | -0.026      | -0.015 |
| White                                        |                                                | (reference) |        |
| American Indian                              | -0.012                                         | -0.061      | 0.038  |
| Black                                        | 0.037                                          | 0.021       | 0.053  |
| Other race                                   | 0.013                                          | -0.024      | 0.051  |
| Hispanic ethnicity                           | 0.002                                          | -0.023      | 0.026  |
| Alcohol use                                  | 0.019                                          | -0.017      | 0.056  |
| Drug use                                     | 0.090                                          | 0.062       | 0.117  |
| Smoking history                              | 0.012                                          | -0.010      | 0.035  |
| Co-morbidities:                              |                                                |             |        |
| Cerebrovascular disease                      | 0.035                                          | 0.020       | 0.050  |
| Peptic ulcer disease                         | 0.061                                          | 0.045       | 0.076  |
| Coronary artery disease                      | 0.044                                          | 0.029       | 0.059  |
| Heart failure                                | 0.055                                          | 0.038       | 0.072  |
| Pulmonary disease                            | 0.046                                          | 0.032       | 0.061  |
| HIV                                          | 0.008                                          | -0.036      | 0.051  |
| Cancer                                       | 0.036                                          | 0.016       | 0.056  |
| Dementia                                     | 0.021                                          | 0.001       | 0.041  |
| Diabetes                                     | 0.040                                          | 0.025       | 0.056  |
| Liver disease                                | 0.036                                          | 0.018       | 0.053  |
| Paralysis                                    | 0.040                                          | 0.010       | 0.070  |
| Peripheral vascular disease                  | 0.025                                          | 0.011       | 0.039  |
| Rheumatic disease                            | 0.031                                          | 0.000       | 0.063  |
| Acuity of illness:                           |                                                |             |        |
| First year of dialysis                       | 0.012                                          | -0.010      | 0.034  |
| Duration of hospitalization (days)           | 0.002                                          | 0.001       | 0.003  |
| Facility Characteristics                     |                                                |             |        |
| Facility size (25 patient difference)        | -0.002                                         | -0.005      | 0.000  |



Table S17: First-Stage Instrumental Variable Regression Results for For Nonprofit Cohort

|                                              | Change in<br>Provider<br>Visits/Month | LCI         | UCI    |
|----------------------------------------------|---------------------------------------|-------------|--------|
| One additional mean visit at facility        | 0.663                                 | 0.622       | 0.703  |
| Demographic & socioeconomic characteristics: |                                       |             |        |
| Male sex                                     | -0.005                                | -0.050      | 0.040  |
| Age (10 years)                               | 0.021                                 | 0.004       | 0.037  |
| White                                        |                                       | (reference) |        |
| Native American                              | -0.057                                | -0.215      | 0.102  |
| Black                                        | 0.039                                 | -0.011      | 0.090  |
| Other race                                   | 0.013                                 | -0.106      | 0.132  |
| Hispanic ethnicity                           | 0.127                                 | 0.048       | 0.207  |
| Alcohol use                                  | -0.143                                | -0.270      | -0.016 |
| Drug use                                     | -0.059                                | -0.155      | 0.037  |
| Smoking history                              | 0.009                                 | -0.066      | 0.084  |
| Co-morbidities:                              |                                       |             |        |
| Cerebrovascular disease                      | 0.053                                 | 0.003       | 0.102  |
| Peptic ulcer disease                         | 0.046                                 | -0.005      | 0.097  |
| Coronary artery disease                      | 0.018                                 | -0.031      | 0.066  |
| Heart failure                                | 0.023                                 | -0.032      | 0.077  |
| Pulmonary disease                            | 0.004                                 | -0.042      | 0.050  |
| HIV                                          | -0.006                                | -0.153      | 0.142  |
| Cancer                                       | -0.019                                | -0.086      | 0.049  |
| Dementia                                     | -0.005                                | -0.073      | 0.063  |
| Diabetes                                     | 0.061                                 | 0.010       | 0.111  |
| Liver disease                                | 0.081                                 | 0.024       | 0.138  |
| Paralysis                                    | -0.007                                | -0.111      | 0.098  |
| Peripheral vascular disease                  | 0.051                                 | 0.005       | 0.098  |
| Rheumatic disease                            | 0.090                                 | -0.014      | 0.195  |
| Acuity of illness:                           |                                       |             |        |
| First year of dialysis                       | -0.068                                | -0.139      | 0.004  |
| Duration of hospitalization (days)           | -0.006                                | -0.008      | -0.004 |
| Facility Characteristics                     |                                       |             |        |
| Facility size (25 patient difference)        | -0.004                                | -0.012      | 0.003  |

Table S18: Regression Results for Cost Analysis

|                                              | Coef.  | LCI         | UCI    |
|----------------------------------------------|--------|-------------|--------|
| Re-hospitalized                              | 1.22   | 1.20        | 1.23   |
| Demographic & socioeconomic characteristics: |        |             |        |
| Male sex                                     | 0.00   | 0.00        | 0.00   |
| Age (1 year)                                 | -0.92  | -1.47       | -0.37  |
| White                                        |        | (reference) |        |
| American Indian                              | 0.009  | -0.006      | 0.023  |
| Black                                        | 0.073  | 0.035       | 0.111  |
| Other race                                   | -0.028 | -0.049      | -0.007 |
| Hispanic ethnicity                           | 0.014  | 0.000       | 0.029  |
| Alcohol use                                  | -0.044 | -0.069      | -0.019 |
| Drug use                                     | -0.055 | -0.076      | -0.035 |
| Smoking history                              | -0.041 | -0.060      | -0.021 |
| Co-morbidities:                              |        |             |        |
| Cerebrovascular disease                      | 0.000  | -0.014      | 0.015  |
| Peptic ulcer disease                         | -0.016 | -0.030      | -0.002 |
| Coronary artery disease                      | 0.017  | 0.000       | 0.034  |
| Heart failure                                | -0.004 | -0.018      | 0.009  |
| Pulmonary disease                            | 0.126  | 0.082       | 0.169  |
| HIV                                          | 0.031  | 0.012       | 0.050  |
| Cancer                                       | 0.046  | 0.027       | 0.064  |
| Dementia                                     | 0.038  | 0.023       | 0.053  |
| Diabetes                                     | 0.020  | 0.003       | 0.038  |
| Liver disease                                | 0.029  | 0.002       | 0.056  |
| Paralysis                                    | 0.067  | 0.054       | 0.081  |
| Peripheral vascular disease                  | 0.032  | 0.004       | 0.060  |
| Rheumatic disease                            | -0.044 | -0.080      | -0.009 |
| Acuity of illness:                           |        |             |        |
| First year of dialysis                       | 0.006  | 0.006       | 0.007  |
| Duration of hospitalization (days)           | 7.898  | 7.857       | 7.938  |
| Facility Characteristics                     |        |             |        |
| Facility size (one patient)                  | 0.001  | -0.001      | 0.004  |

Note: The model also adjusted for geographic location (represented by RUCA code). Based on this estimate, costs in the month following hospital discharge increase by  $e^{1.22} = 3.39$  times the cost without re-hospitalization.

Table S19. Sensitivity Analyses – Estimated Probability of Re-hospitalization under Alternative Visit Frequency Assumptions:

|                                        | Change in probability of re-hospitalization from 1 more visit | LCI    | UCI    |
|----------------------------------------|---------------------------------------------------------------|--------|--------|
| Assumption:                            |                                                               |        |        |
| Claims for 4 or more visits = 6 visits | -0.019                                                        | -0.030 | -0.009 |
| Claims for 2-3 visits equals 3 visits  | -0.038                                                        | -0.059 | -0.017 |
| Claims for 2-3 visits equals 2 visits  | -0.032                                                        | -0.049 | -0.014 |

Table S20: Sensitivity Analyses – Probability of Re-hospitalization using Mean Visit Frequency by Health Service Area as an Instrumental Variable

|                           | Change in probability of re-hospitalization from 1 more visit | LCI    | UCI    | p-value |
|---------------------------|---------------------------------------------------------------|--------|--------|---------|
| <b>For Profit</b>         |                                                               |        |        |         |
| Metropolitan              |                                                               |        |        |         |
| No Medicaid (main cohort) | -0.038                                                        | -0.060 | -0.016 | <0.001  |
| Medicaid                  | -0.059                                                        | -0.089 | -0.030 | <0.001  |
| Non metropolitan          |                                                               |        |        |         |
| No Medicaid               | -0.016                                                        | -0.042 | 0.011  | 0.25    |
| Medicaid                  | -0.011                                                        | -0.038 | 0.015  | 0.40    |
| <b>Non Profit</b>         | -0.021                                                        | 0.046  | 0.000  | 0.05    |

Note: UCI and LCI are 95% confidence intervals.

Health Service Area (HSA) was assigned to patients based upon the HSA from the zip code at the facility where they dialyzed. In these analyses we used mean visit frequency to prevalent hemodialysis patients by HSA as an instrumental variable to predict physician visits in the month following hospital discharge. Otherwise, the same methods were in these analyses as were used in the primary analyses (described in “Methods” in the manuscript).

Table S21: Sensitivity Analyses – Change in the probability of re-hospitalization associated with one more visit per month using visits per available day as the exposure.

|                               | Change in probability of re-hospitalization | LCI    | UCI    |
|-------------------------------|---------------------------------------------|--------|--------|
| <b>For-profit</b>             |                                             |        |        |
| Metropolitan                  |                                             |        |        |
| Non-medicaid (primary cohort) | -0.018                                      | -0.036 | -0.001 |
| Medicaid                      | -0.040                                      | 0.000  | -0.060 |
| Non-metropolitan              |                                             |        |        |
| Non-medicaid                  | -0.012                                      | -0.035 | 0.010  |
| Medicaid                      | -0.004                                      | -0.026 | 0.018  |
| <b>Nonprofit</b>              |                                             |        |        |
|                               | -0.030                                      | -0.048 | -0.011 |

Note: UCI and LCI are 95% confidence intervals. Estimates for one more visit per month are obtained by multiplying regression results (which correspond to one additional visit per day) by 0.032854, which is 1/(average number of days per month).

Table S22: Sensitivity Analyses – Controlling for clustering within dialysis facilities in the primary study cohort

|                                              | Change in probability<br>of re-hospitalization | LCI         | UCI    |
|----------------------------------------------|------------------------------------------------|-------------|--------|
| Physician Visits (per 1 additional)          | -0.035                                         | -0.054      | -0.015 |
| Demographic & socioeconomic characteristics: |                                                |             |        |
| Male sex                                     | 0.020                                          | 0.008       | 0.033  |
| Age (10 years)                               | -0.015                                         | -0.021      | -0.010 |
| White                                        |                                                | (reference) |        |
| Native American                              | -0.058                                         | -0.136      | 0.020  |
| Black                                        | 0.011                                          | -0.003      | 0.025  |
| Other race                                   | -0.024                                         | -0.063      | 0.016  |
| Hispanic ethnicity                           | -0.014                                         | -0.037      | 0.008  |
| Alcohol use                                  | 0.018                                          | -0.024      | 0.059  |
| Drug use                                     | 0.061                                          | 0.031       | 0.092  |
| Smoking history                              | 0.049                                          | 0.026       | 0.072  |
| Co-morbidities:                              |                                                |             |        |
| Cerebrovascular disease                      | 0.022                                          | 0.009       | 0.035  |
| Peptic ulcer disease                         | 0.041                                          | 0.027       | 0.055  |
| Coronary artery disease                      | 0.063                                          | 0.049       | 0.076  |
| Heart failure                                | 0.067                                          | 0.052       | 0.082  |
| Pulmonary disease                            | 0.032                                          | 0.019       | 0.045  |
| HIV                                          | 0.029                                          | -0.035      | 0.093  |
| Cancer                                       | 0.029                                          | 0.013       | 0.045  |
| Dementia                                     | 0.029                                          | 0.011       | 0.046  |
| Diabetes                                     | 0.030                                          | 0.016       | 0.043  |
| Liver disease                                | 0.045                                          | 0.026       | 0.064  |
| Paralysis                                    | 0.001                                          | -0.026      | 0.028  |
| Peripheral vascular disease                  | 0.036                                          | 0.024       | 0.048  |
| Rheumatic disease                            | -0.027                                         | -0.053      | 0.000  |
| Acuity of illness:                           |                                                |             |        |
| First year of dialysis                       | 0.003                                          | -0.014      | 0.020  |
| Duration of hospitalization (1 day)          | 0.002                                          | 0.001       | 0.002  |
| Facility Characteristics                     |                                                |             |        |
| Facility size (25 patient difference)        | -0.003                                         | -0.005      | 0.000  |

Table S23: Comparison of Characteristics by Age Group

|                                         | Over 50<br>(n=73542) | Under 50<br>(n=16,326) | Standardized<br>Difference |
|-----------------------------------------|----------------------|------------------------|----------------------------|
| <b>Demographic</b>                      |                      |                        |                            |
| Males - (%)                             | 46.6                 | 51.1                   | 9.1                        |
| Age - (years)                           | 68.6                 | 40.2                   |                            |
| American Indian - (%)                   | 1.3                  | 1.6                    | 2.1                        |
| Black - (%)                             | 37.6                 | 56.6                   | 38.8                       |
| White - (%)                             | 57.9                 | 39.8                   | 36.9                       |
| Other race - (%)                        | 3.2                  | 2.1                    | 6.9                        |
| Hispanic ethnicity - (%)                | 12.2                 | 12.4                   | 0.4                        |
| <b>Socioeconomic and co-morbidities</b> |                      |                        |                            |
| Alcohol use - (%)                       | 2.8                  | 7.9                    | 22.7                       |
| Drug use - (%)                          | 5.2                  | 21.3                   | 49.2                       |
| Smokes - (%)                            | 9.9                  | 27.5                   | 46.6                       |
| Cerebrovascular disease - (%)           | 44.2                 | 28.2                   | 33.7                       |
| Peptic ulcer disease - (%)              | 29.2                 | 30.6                   | 3.0                        |
| Coronary artery disease - (%)           | 38.5                 | 29.4                   | 19.4                       |
| Heart failure - (%)                     | 81.5                 | 72.3                   | 22.0                       |
| Pulmonary disease - (%)                 | 51.5                 | 43.0                   | 17.1                       |
| HIV positive - (%)                      | 1.1                  | 7.8                    | 32.6                       |
| Cancer - (%)                            | 14.3                 | 7.0                    | 23.9                       |
| Dementia - (%)                          | 17.7                 | 6.1                    | 36.5                       |
| Diabetes - (%)                          | 75.0                 | 58.6                   | 35.4                       |
| Liver disease - (%)                     | 15.6                 | 26.1                   | 26.0                       |
| Paralysis - (%)                         | 6.4                  | 5.6                    | 3.3                        |
| PVD - (%)                               | 52.6                 | 35.1                   | 35.9                       |
| Rheumatic disease - (%)                 | 4.6                  | 10.3                   | 22.0                       |
| <b>Acuity of care and facility</b>      |                      |                        |                            |
| First year of hemodialysis - (%)        | 12.6                 | 9.2                    | 10.9                       |
| Duration of hosp. - (days)              | 9.7                  | 9.3                    | 3.0                        |
| Facility size - (# patients)            | 97.0                 | 97.8                   | 1.3                        |

Table S24: Reduction in Absolute Probability of Re-hospitalization from an Additional Physician Visit Under Alternative Scenarios about Relative Efficacy

|                                                         | Percent of visits performed by physicians <sup>2</sup> |      |      |
|---------------------------------------------------------|--------------------------------------------------------|------|------|
|                                                         | 50%                                                    | 60%  | 70%  |
| Physicians are 20% more effective than APs <sup>1</sup> | 3.82                                                   | 3.75 | 3.68 |
| Physicians are 40% more effective than APs <sup>1</sup> | 4.08                                                   | 3.95 | 3.83 |

<sup>1</sup> Effectiveness refers to effectiveness in preventing re-hospitalization

<sup>2</sup> the remaining visits are assumed to be performed by advanced practitioners

AP - Advanced Practitioner.

Table S25: Expanded Model – Primary Study Cohort

|                                              | Change in probability<br>of re-hospitalization | LCI    | UCI    |
|----------------------------------------------|------------------------------------------------|--------|--------|
| Physician Visits (per 1 additional)          | -0.034                                         | -0.052 | -0.015 |
| Demographic & socioeconomic characteristics: |                                                |        |        |
| Male sex                                     | 0.019                                          | 0.007  | 0.031  |
| Age (10 years)                               | -0.018                                         | -0.024 | -0.013 |
| White                                        | (reference)                                    |        |        |
| Native American                              | -0.052                                         | -0.135 | 0.031  |
| Black                                        | 0.014                                          | 0.000  | 0.028  |
| Other race                                   | -0.019                                         | -0.059 | 0.021  |
| Hispanic ethnicity                           | -0.010                                         | -0.032 | 0.013  |
| Alcohol use                                  | 0.016                                          | -0.026 | 0.058  |
| Drug use                                     | 0.058                                          | 0.028  | 0.088  |
| Smoking history                              | 0.052                                          | 0.030  | 0.074  |
| Co-morbidities:                              |                                                |        |        |
| Cerebrovascular disease                      | 0.018                                          | 0.005  | 0.031  |
| Peptic ulcer disease                         | 0.039                                          | 0.025  | 0.054  |
| Coronary artery disease                      | 0.064                                          | 0.051  | 0.077  |
| Heart failure                                | 0.067                                          | 0.052  | 0.081  |
| Pulmonary disease                            | 0.034                                          | 0.021  | 0.046  |
| HIV                                          | 0.027                                          | -0.035 | 0.090  |
| Cancer                                       | 0.029                                          | 0.013  | 0.045  |
| Dementia                                     | 0.021                                          | 0.004  | 0.039  |
| Diabetes                                     | 0.024                                          | 0.011  | 0.038  |
| Liver disease                                | 0.045                                          | 0.027  | 0.064  |
| Paralysis                                    | -0.005                                         | -0.032 | 0.021  |
| Peripheral vascular disease                  | 0.031                                          | 0.019  | 0.043  |
| Rheumatic disease                            | -0.028                                         | -0.054 | -0.001 |
| Acuity of illness:                           |                                                |        |        |
| First year of dialysis                       | 0.002                                          | -0.016 | 0.019  |
| Duration of hospitalization (days)           | 0.001                                          | 0.001  | 0.002  |
| Facility Characteristics                     |                                                |        |        |
| Facility size (25 patient difference)        | -0.002                                         | -0.006 | 0.001  |
| Hospital based facility                      | 0.052                                          | -0.011 | 0.116  |



Table S25 (Continued)

|                                  | Change in probability<br>of re-hospitalization | LCI    | UCI    |
|----------------------------------|------------------------------------------------|--------|--------|
| Discharge characteristics:       |                                                |        |        |
| To Skilled Nursing Facility      | 0.015                                          | -0.008 | 0.038  |
| To Home                          | -0.045                                         | -0.068 | -0.023 |
| To Home Health                   | -0.012                                         | -0.036 | 0.012  |
| Reason for Index Hospitalization |                                                |        |        |
| Circulatory disorder             | 0.001                                          | -0.014 | 0.016  |
| Digestive disorder               | 0.004                                          | -0.019 | 0.026  |
| Endocrinologic disorder          | 0.027                                          | 0.003  | 0.051  |
| Infectious disorder              | 0.013                                          | -0.011 | 0.038  |
| Respiratory disorder             | -0.012                                         | -0.032 | 0.008  |

Note: Cause of index hospitalization is determined by the primary ICD 9 diagnosis code. Disease categories were defined using methods reported from the USRDS Atlas<sup>4</sup> in the following way: Circulatory diseases: ICD 9 390-459; Digestive diseases: ICD 9 520-579; Endocrine diseases: ICD 9 240 – 279; Respiratory diseases: ICD 9 460 – 519; Infectious diseases: ICD 9 001 – 139.

Table S26: Linear Regression Results without Using Instrumental Variable

|                                              | Change in probability<br>of re-hospitalization | LCI         | UCI    |
|----------------------------------------------|------------------------------------------------|-------------|--------|
| Physician Visits (per 1 additional)          | -0.090                                         | -0.092      | -0.088 |
| Demographic & socioeconomic characteristics: |                                                |             |        |
| Male sex                                     | 0.008                                          | 0.002       | 0.015  |
| Age (10 years)                               | -0.019                                         | -0.021      | -0.017 |
| White                                        |                                                | (reference) |        |
| Native American                              | -0.025                                         | -0.052      | 0.001  |
| Black                                        | 0.026                                          | 0.019       | 0.033  |
| Other race                                   | 0.001                                          | -0.017      | 0.019  |
| Hispanic ethnicity                           | -0.004                                         | -0.014      | 0.006  |
| Alcohol use                                  | 0.019                                          | 0.002       | 0.036  |
| Drug use                                     | 0.071                                          | 0.059       | 0.084  |
| Smoking history                              | 0.039                                          | 0.029       | 0.048  |
| Co-morbidities:                              |                                                |             |        |
| Cerebrovascular disease                      | 0.024                                          | 0.017       | 0.030  |
| Peptic ulcer disease                         | 0.044                                          | 0.038       | 0.051  |
| Coronary artery disease                      | 0.046                                          | 0.039       | 0.052  |
| Heart failure                                | 0.054                                          | 0.046       | 0.062  |
| Pulmonary disease                            | 0.035                                          | 0.028       | 0.041  |
| HIV                                          | 0.025                                          | 0.004       | 0.046  |
| Cancer                                       | 0.027                                          | 0.018       | 0.036  |
| Dementia                                     | 0.019                                          | 0.010       | 0.028  |
| Diabetes                                     | 0.031                                          | 0.024       | 0.038  |
| Liver disease                                | 0.038                                          | 0.030       | 0.047  |
| Paralysis                                    | 0.010                                          | -0.003      | 0.023  |
| Peripheral vascular disease                  | 0.032                                          | 0.026       | 0.038  |
| Rheumatic disease                            | 0.006                                          | -0.007      | 0.020  |
| Acuity of illness:                           |                                                |             |        |
| First year of dialysis                       | 0.002                                          | -0.007      | 0.011  |
| Duration of hospitalization (days)           | 0.001                                          | 0.001       | 0.001  |
| Facility Characteristics                     |                                                |             |        |
| Facility size (25 patient difference)        | 0.002                                          | 0.000       | 0.003  |

1. Angrist, JD, Krueger, AB: The Effect of Age at School Entry on Educational Attainment: An Application of Instrumental Variables with Moments from Two Samples. *Journal of the American Statistical Association*, 87: 328-336, 1992.
2. Manacorda, M, Moretti, E: Why Do Most Italian Young Men Live With Their Parents? Intergenerational Transfers And Household Structure. *Discussion Paper*. Centre for Economic Policy Research, 2005.
3. O'Hare, AM, Rodriguez, RA, Hailpern, SM, Larson, EB, Kurella Tamura, M: Regional variation in health care intensity and treatment practices for end-stage renal disease in older adults. *JAMA*, 304: 180-186, 2010.
4. USRDS: Annual Data Report: Atlas of Chronic Kidney Disease and End-Stage Renal Disease in the United States. *United States Renal Data System*. Bethesda, MD, National Institutes of Health, National Institute of Diabetes and Digestive and Kidney Diseases, 2011.
5. Terza, JV, Basu, A, Rathouz, PJ: Two-stage residual inclusion estimation: addressing endogeneity in health econometric modeling. *Journal of Health Economics*, 27: 531-543, 2008.
